# Supplementary material for: Influence of family history on prognosis of spinal pain and the role of leisure time physical activity and body mass index: a prospective study using family-linkage data from the Norwegian HUNT study
Source: PubMed Central journal article supplement — BMJ Open. 2018 Oct 18;8(10):e022785. doi: 10.1136/bmjopen-2018-022785 (PMC6196861; doi:10.1136/bmjopen-2018-022785), 2018-10-18
Supplement: bmjopen-2018-022785.draft_revisions.pdf [file bmjopen-2018-022785.draft_revisions.pdf]

# BMJ Open

BMJ Open is committed to open peer review. As part of this commitment we make the peer review history of every article we publish publicly available.

When an article is published we post the peer reviewers' comments and the authors' responses online. We also post the versions of the paper that were used during peer review. These are the versions that the peer review comments apply to.

The versions of the paper that follow are the versions that were submitted during the peer review process. They are not the versions of record or the final published versions. They should not be cited or distributed as the published version of this manuscript.

BMJ Open is an open access journal and the full, final, typeset and author-corrected version of record of the manuscript is available on our site with no access controls, subscription charges or pay-per-view fees (<http://bmjopen.bmj.com>).

If you have any questions on BMJ Open's open peer review process please email [info.bmjopen@bmj.com](mailto:info.bmjopen@bmj.com)

# BMJ Open

## The influence of family history on prognosis of spinal pain and the role of leisure time physical activity and body mass index: family-linkage data from the Norwegian HUNT Study.

|                               |                                                                                                                                                                                                                                                                                                                                                                                                                                                                                                                                                                                                                                                                                                                                                                                                                                                                             |
|-------------------------------|-----------------------------------------------------------------------------------------------------------------------------------------------------------------------------------------------------------------------------------------------------------------------------------------------------------------------------------------------------------------------------------------------------------------------------------------------------------------------------------------------------------------------------------------------------------------------------------------------------------------------------------------------------------------------------------------------------------------------------------------------------------------------------------------------------------------------------------------------------------------------------|
| Journal:                      | <i>BMJ Open</i>                                                                                                                                                                                                                                                                                                                                                                                                                                                                                                                                                                                                                                                                                                                                                                                                                                                             |
| Manuscript ID                 | bmjopen-2018-022785                                                                                                                                                                                                                                                                                                                                                                                                                                                                                                                                                                                                                                                                                                                                                                                                                                                         |
| Article Type:                 | Research                                                                                                                                                                                                                                                                                                                                                                                                                                                                                                                                                                                                                                                                                                                                                                                                                                                                    |
| Date Submitted by the Author: | 06-Mar-2018                                                                                                                                                                                                                                                                                                                                                                                                                                                                                                                                                                                                                                                                                                                                                                                                                                                                 |
| Complete List of Authors:     | <p>Amorim, Anita; The University of Sydney, Faculty of Health Sciences<br/> Ferreira, Paulo; University of Sydney, Faculty of Health Science<br/> Ferreira, Manuela; University of Sydney Institute of Bone and Joint Research,<br/> Lier, Ragnhild; NTNU Det Medisinske Fakultet DMF, Department of Public Health and General Practice<br/> Simic, Milena; The University of Sydney, Physiotherapy<br/> Pappas, Evangelos; University of Sydney, Discipline of Physiotherapy, Faculty of Health Sciences; University of Sydney<br/> Zadro, Joshua; University of Sydney, Faculty of Health Science<br/> Mork, Paul Jarle; Norges teknisk-naturvitenskapelige universitet, Department of Public Health and Nursing; Norwegian University of Science and Technology<br/> Nilsen, Tom; NTNU Det Medisinske Fakultet DMF, Department of Public Health and General Practice</p> |
| Keywords:                     | Low back pain, neck pain, chronic pain, obesity, family study, physical activity                                                                                                                                                                                                                                                                                                                                                                                                                                                                                                                                                                                                                                                                                                                                                                                            |
|                               |                                                                                                                                                                                                                                                                                                                                                                                                                                                                                                                                                                                                                                                                                                                                                                                                                                                                             |

SCHOLARONE™  
Manuscripts

1  
2  
3 **The influence of family history on prognosis of spinal pain and the role of leisure time**  
4 **physical activity and body mass index: family-linkage data from the Norwegian HUNT**  
5 **Study.**  
6  
7  
8  
9

10  
11  
12 Anita B. Amorim<sup>1</sup>; Paulo H. Ferreira<sup>1</sup>; Manuela L. Ferreira<sup>2</sup>; Ragnhild Lier<sup>3</sup>; Milena Simic<sup>1</sup>;  
13  
14 Evangelos Pappas<sup>1</sup>; Joshua R. Zadro<sup>1</sup>; Paul Jarle Mork<sup>3</sup>; Tom Ivar Lund Nilsen<sup>3,4\*</sup>  
15  
16

17  
18  
19 <sup>1</sup> The University of Sydney, Discipline of Physiotherapy, Faculty of Health Sciences, Sydney,  
20  
21 NSW, Australia.  
22

23  
24 <sup>2</sup> Institute of Bone and Joint Research, The Kolling Institute, Sydney Medical School, Sydney,  
25  
26 Australia  
27

28  
29 <sup>3</sup> Department of Public Health and Nursing, Norwegian University of Science and Technology,  
30  
31 Trondheim, Norway  
32

33  
34 <sup>4</sup> Clinic of Anaesthesia and Intensive Care, St Olavs Hospital, Trondheim University Hospital,  
35  
36 Trondheim, Norway  
37

38  
39  
40 \*Corresponding author: Tom Ivar Lund Nilsen – NTNU Det Medisinske Fakultet DMF,  
41  
42 Department of Public Health and General Practice, Norwegian University of Science and  
43  
44 Technology, Trondheim, Norway  
45

46  
47 Telephone: +47 73598224/ email: tom.nilsen@ntnu.no  
48  
49

50  
51 Word count: 3,906  
52  
53  
54  
55  
56  
57  
58  
59  
60

## ABSTRACT

**Objectives:** To investigate the influence of parental chronic spinal pain on prognosis of chronic spinal pain in adult offspring, and whether offspring physical activity level and body mass index (BMI) modified this association.

**Design:** Prospective cohort study.

**Setting:** We used family linked longitudinal data from the Norwegian HUNT study collected in HUNT2 (1995-97) and HUNT3 (2006-08).

**Participants:** A total of 1,529 offspring who reported spinal pain in HUNT2 were linked with parental data and followed-up in HUNT3.

**Outcomes:** We estimated relative risk (RR) with 95% confidence intervals (CIs) for recovery from chronic spinal pain, and also from activity limiting spinal pain, in offspring related to chronic spinal pain in parents. We also investigated whether offspring leisure time physical activity and BMI modified these intergenerational associations in spinal pain.

**Results:** Offspring with both parents reporting chronic spinal pain were less likely to recover from chronic spinal pain (RR: 0.83, 95% CI: 0.69, 0.99) and activity limiting spinal pain (RR: 0.71, 95% CI: 0.54, 0.94), compared to offspring of parents without chronic spinal pain.

Analyses stratified by BMI and physical activity showed no strong evidence of effect modification on these associations. However, offspring who were overweight/obese and with both parents reporting spinal pain had particularly low probability of recovery from activity limiting spinal pain, compared those who were normal weight and had parents without spinal pain (RR: 0.57, 95% CI: 0.39-0.84).

**Conclusion:** Offspring with chronic spinal pain are less likely to recover if they have parents with chronic spinal pain, particularly if offspring are overweight/obese.

1  
2  
3  
4  
5 **Key words:** Low back pain, neck pain, chronic pain, obesity, family study, physical activity.  
6  
7  
8  
9

### 10 **Strengths and limitations of this study**

- 12 • The HUNT Study is a large population-based health study with longitudinal data that  
13 allows prospective analysis on the prognosis of chronic spinal pain.  
14
- 15 • Chronic spinal pain was independently reported in parents and offspring; family relations  
16 was informed by a linkage with a national registry; and the data allowed us to control for  
17 a wide range of potential confounders.  
18
- 19 • Information on pain status, physical activity, and body mass index was not updated  
20 throughout the follow-up period.  
21  
22  
23  
24  
25  
26  
27  
28  
29  
30  
31  
32  
33  
34  
35  
36  
37  
38  
39  
40  
41  
42  
43  
44  
45  
46  
47  
48  
49  
50  
51  
52  
53  
54  
55  
56  
57  
58  
59  
60

## INTRODUCTION

Spinal pain that includes low back and neck pain is highly prevalent and a common cause of disability worldwide.[1] The natural history of spinal pain is extremely variable and may last a few days or persist for many years.[2] A substantial proportion of patients recover within the first three months of a spinal pain episode, but around three quarters of the remaining patients are likely to experience pain one year after onset.[3, 4] People who fail to recover in the first few months following an acute episode are at greater risk of poor prognosis.[5] Spinal pain, especially in its chronic and disabling form, could be a significant personal and financial burden,[6] and may also influence families and society.[1] It is therefore vital to identify factors that influence prognosis of spinal pain, which in turn can inform preventive interventions to reduce chronicity.

Parental pain is strongly associated with the increased risk of chronic musculoskeletal pain in offspring, both during adolescence[7], and in later adulthood.[8] Furthermore, there is preliminary evidence that treatment response in patients with chronic low back pain is influenced by genetic factors.[9] It is, therefore, possible that parental history of spinal pain influences the prognosis of spinal pain in offspring. Conversely, several studies have shown that engagement in moderate to vigorous-intensity leisure time physical activity and maintenance of a normal body mass index (BMI) are associated with better prognosis of spinal pain.[10-14] Thus, a healthy offspring lifestyle could modify a possible adverse effect of parental spinal pain on prognosis of offspring spinal pain. Currently, there is limited knowledge about the influence of parental spinal pain on prognosis of spinal pain in offspring and whether this association is modified by offspring lifestyle.

1  
2  
3 In this study, we have used population-based longitudinal data from the Norwegian HUNT Study  
4  
5 to investigate the influence of parental spinal pain on the prognosis of chronic spinal pain  
6  
7 regarding severity and activity limitation in the adult offspring. We have also investigated  
8  
9 whether offspring leisure time physical activity and BMI modify any of these associations.  
10  
11  
12  
13

## 14 **METHODS**

### 15 **Study population**

16  
17 The HUNT Study is a population-based health study conducted within the county of Nord-  
18  
19 Trøndelag, Norway. The study was performed in three consecutive waves, first in 1984–1986  
20  
21 (HUNT1), then in 1995–1997 (HUNT2), and last in 2006–2008 (HUNT3). In all three surveys,  
22  
23 all residents 20 years of age and older were invited to participate, and information on lifestyle  
24  
25 and health-related factors were collected by questionnaires and a clinical examination.  
26  
27 Information on musculoskeletal pain was not collected at HUNT1. Therefore, those who were  
28  
29 eligible for inclusion in this study had participated at HUNT2 and HUNT3. At HUNT2, 93,898  
30  
31 individuals were invited to participate, and 65,237 (65.5%) joined the study, while at HUNT3  
32  
33 93,860 were invited and 50,807 (54.1%) agreed to participate.[15, 16] Each participant signed  
34  
35 written consent, and the study was approved by the Regional Committee for Medical and Health  
36  
37 Research Ethics Central Norway (ref. no. 2011/1455). Further information about selection  
38  
39 procedures, participation and questionnaires used in the HUNT study can be found at  
40  
41 <http://www.ntnu.edu/hunt>.  
42  
43  
44  
45  
46  
47  
48  
49  
50

### 51 **Patient involvement**

1  
2  
3 Since historical cohort data was used in this study, patients were not involved in the conduct and  
4  
5 design of the study.  
6  
7  
8  
9

### 10 **Record linkage**

11  
12 The unique personal identification number held by all Norwegian citizens was used to link each  
13  
14 participant's record to information from the Family Registry at Statistics Norway, and therefore  
15  
16 establish a link between parents and offspring who participated in one or both of HUNT2 and  
17  
18 HUNT3. A total of 11,483 offspring reported spinal pain at HUNT2, and of these, 6,662 could be  
19  
20 followed-up on spinal pain status in HUNT3, approximately 11 years later. To be able to study  
21  
22 the association between parental spinal pain and offspring prognosis of spinal pain, we selected  
23  
24 all 1,529 parent–offspring trios (i.e., mother, father and adult offspring) where both the mother  
25  
26 and the father had information on spinal pain from HUNT2.  
27  
28  
29  
30  
31  
32

### 33 **Chronic spinal pain**

34  
35 At HUNT2 and HUNT3, participants were asked to complete the Standardized Nordic  
36  
37 Questionnaire which has acceptable reliability and validity.[17] The question regarding  
38  
39 musculoskeletal pain was as follows: “In the last year, have you had pain and/or stiffness in  
40  
41 muscles or joints that have lasted at least 3 consecutive months?” (response options: “no” and  
42  
43 “yes”). Participants who answered “yes” were asked to indicate the affected body area(s).  
44  
45  
46 Offspring who reported chronic neck and/or low back pain (spinal pain) at HUNT2 were  
47  
48 included in this study, and offspring who also reported spinal pain at HUNT3 were considered  
49  
50 not recovered (outcome measure). Offspring reporting spinal pain at HUNT2 were also asked to  
51  
52 indicate if the pain had led to reduced leisure time activity (response options: “no”, and “yes”) or  
53  
54  
55  
56  
57  
58  
59  
60



1  
2  
3 reduced their work ability (response options: “no”, “to some extent”, “considerably”, or “don’t  
4 know”). Offspring who answered “yes” to the question on reduced leisure time activity and/or  
5 reported work ability to be reduced “to some extent” or “considerably”, were classified as having  
6 “activity limiting spinal pain”. In secondary analyses, we used this information to investigate the  
7 prognosis of activity limiting spinal pain; i.e., recovery was defined as not reporting activity  
8 limiting spinal pain at HUNT3. Based on the same question as described above, we obtained  
9 information on parental chronic spinal pain. Further, we created a variable with four mutually  
10 exclusive categories for presence of parental chronic spinal pain at baseline (exposure measure):  
11 “none”, “mother”, “father”, or “both parents”.  
12  
13  
14  
15  
16  
17  
18  
19  
20  
21  
22  
23  
24  
25

### 26 **Leisure time physical activity**

27  
28 Leisure time physical activity was assessed by the following question “How much of your leisure  
29 time have you been physically active during the last year? (Think of a weekly average for the  
30 year. Your commute to work counts as leisure time)”. Participants reported the number of hours  
31 of either light (no sweating or heavy breathing) or hard (sweating and heavy breathing) activity  
32 using the response options “none”, “less than 1 hour”, “1–2 hours”, and “3 or more hours” for  
33 each type of activity. Based on this information, we constructed a variable with four categories  
34 (combining information on light and hard activity): 1) “inactive” (no light or hard activity), 2)  
35 “low activity” (<3 hours light and no hard activity), 3) “moderate activity” (≥3 hours light and/or  
36 <1 hour hard activity), and 4) “high activity” (any light and ≥1 hour hard activity). In the  
37 combined analyses of parental chronic spinal pain and offspring leisure time physical activity the  
38 categories “inactive” and “low activity” were collapsed into one category labelled “Physically  
39 inactive” and the categories “moderate activity” and “high activity” were collapsed into one  
40  
41  
42  
43  
44  
45  
46  
47  
48  
49  
50  
51  
52  
53  
54  
55  
56  
57  
58  
59  
60

1  
2  
3 category labelled “Physically active”. This categorization has been used previously in other  
4  
5 studies based in data from HUNT.[18, 19]  
6  
7  
8  
9

### 10 **Body mass index**

11  
12 Standardized measurements of body height (to the nearest centimetre) and body weight (to the  
13  
14 nearest half kilogram) were obtained at clinical examination. BMI was calculated as weight  
15  
16 divided by the square of height ( $\text{kg}/\text{m}^2$ ), and classified into four BMI groups according to the  
17  
18 cut-off points suggested by the World Health Organization:[20] underweight ( $\text{BMI} < 18.5 \text{ kg}/\text{m}^2$ ),  
19  
20 normal weight ( $\text{BMI} 18.5\text{--}24.9 \text{ kg}/\text{m}^2$ ), overweight ( $\text{BMI} 25.0\text{--}29.9 \text{ kg}/\text{m}^2$ ), and obese ( $\text{BMI}$   
21  
22  $\geq 30.0 \text{ kg}/\text{m}^2$ ). Only 27 participants (1 %) were classified as “underweight”, and the combined  
23  
24 analysis of parental chronic spinal pain and offspring BMI, the categories “underweight” and  
25  
26 “normal weight” were collapsed into one category labelled “normal weight”. The categories  
27  
28 “overweight” and “obese” were collapsed into one category labelled “overweight/obese”.  
29  
30  
31  
32  
33  
34

### 35 **Statistical analysis**

36  
37 We used a Poisson regression model [21-24] to estimate relative risk (RR) of chronic spinal pain  
38  
39 and activity limiting spinal pain in offspring whose parents reported chronic spinal pain, using  
40  
41 parents with no chronic spinal pain as the reference category. Precision of estimates was assessed  
42  
43 by a 95% confidence interval (CI). All standard errors were adjusted for within-family clustering  
44  
45 (i.e., siblings) using the vce (cluster) option in Stata, treating observations between families as  
46  
47 independent and within families as dependent, and thus avoiding inflated precision of the  
48  
49 estimated associations.[25]  
50  
51  
52  
53  
54  
55  
56  
57  
58  
59  
60

Possible effect modification by offspring leisure time physical activity or offspring BMI was assessed by stratified analyses (i.e. physically active vs physically inactive and normal weight vs overweight/obese) as well as by tests of the estimated relative excess risk due to interaction (RERI) (i.e., departure from additive effects). We calculated RERI estimates with 95% CIs from the following equation:  $RERI = RR_{\text{parental pain \& physically active/overweight and/or obese}} - RR_{\text{parental pain \& physically activity/ overweight and/or obese}} - RR_{\text{parental pain \& physically inactivity/normal weight}} + 1$ , [26] i.e.,  $RERI > 0$  indicate a synergistic effect beyond an additive effect. Statistical interaction was also evaluated on a multiplicative scale by a likelihood ratio test of a product term in the model (these likelihood ratio tests had to be run without cluster-adjusted standard errors to avoid misspecification of the model).

The main analyses (parental influence on risk of poor prognosis) were adjusted for possible confounding by offspring sex (male, female), age (continuous), BMI (“underweight”, “normal weight”, “overweight”, “obese”, or “unknown”), leisure time physical activity (“physically inactive” or “physically active”, or “unknown”), education (“<10 years”, “10–12 years”, “>13 years”, or “unknown”), and depression (“depressed”, or “not depressed”, or “unknown”).

Depression was assessed using the depression subscale of the Hospital Anxiety and Depression Scale (HADS) using a score of 8 as a cut-off for a dichotomised variable.[27-29]

All statistical tests were two-sided, and all analyses were conducted using Stata statistical software (version 13.0, STATA Corp., College Station, TX, USA).

## RESULTS

In this prospective study of 1,529 offspring with chronic spinal pain at baseline, a total of 540 (35%) offspring were defined as recovered after approximately 11 years of follow-up.

Additionally, among 775 offspring with activity limiting spinal pain, 244 were defined as recovered at follow-up. Descriptive statistics of offspring, mothers, and fathers are shown in Table 1. The mean age at baseline was 32.8 (8.6) years among offspring. Most offspring were physically active (64.7%), and about half of the offspring (52.9%) were classified as overweight or obese. About one third (36.9%) of the offspring were current smokers, and just a small portion of offspring (18.7%) reported having a higher education degree. A small proportion (10.5%) of offspring had symptoms of depression according to the Hospital Anxiety and Depression Scale.

Table 1. Baseline characteristics of the study population at HUNT2

| Variables                                    | Offspring  | Mothers      | Fathers      |
|----------------------------------------------|------------|--------------|--------------|
| Participants, no.                            | 1,529      | 1,529        | 1,529        |
| Age, mean (SD)                               | 32.8 (8.6) | 63.8 (9.4)   | 67.2 (9.5)   |
| Body mass index, mean (SD)                   | 25.9 (5.2) | 28.3(7.3)    | 27.6 (6.9)   |
| Overweight/obese, % (n)                      | 42.3 (799) | 70.6 (1,080) | 72.2 (1,104) |
| Physically active <sup>a</sup> , % (n)       | 63.9 (977) | 43.0 (510)   | 57.7 (716)   |
| Current smoker, % (n)*                       | 33.1 (506) | 26.3 (400)   | 28.5 (434)   |
| Higher education <sup>b</sup> , % (n)        | 20.7 (316) | 4.5 (61)     | 6.0 (84)     |
| Symptoms of depression <sup>c</sup> , %, (n) | 10.4 (155) | 17.0 (225)   | 16.5 (215)   |

SD, standard deviation

<sup>a</sup> Engagement in moderate ( $\geq 3$  hours light and/or  $< 1$  hour hard activity per week) or high leisure time physical activity (any light and  $\geq 1$  hour hard activity per week)

<sup>b</sup> University education or higher

<sup>c</sup> Score  $\geq 8$  on the Hospital Anxiety and Depression Scale

### Chronic spinal pain and activity limiting spinal pain

Offspring with both parents reporting chronic spinal pain were less likely to recover from chronic spinal pain (RR: 0.83, 95% CI: 0.69, 0.99) and activity limiting spinal pain (RR: 0.71, 95% CI: 0.54-0.94) compared to offspring with no parents with chronic spinal pain (Table 2). These associations were weaker and less precise when chronic spinal pain was present in only one parent, with similar associations observed for maternal and paternal spinal pain.

Table 2. Relative risk (RR) of recovery from spinal pain and activity limiting spinal pain in adult offspring associated with parental spinal pain.

| Parental spinal pain | Offspring spinal pain |              |          |                                   | Offspring activity limiting spinal pain |              |          |                                   |
|----------------------|-----------------------|--------------|----------|-----------------------------------|-----------------------------------------|--------------|----------|-----------------------------------|
|                      | No. of persons        | No. of cases | Crude RR | Adjusted RR <sup>a</sup> (95% CI) | No. of persons                          | No. of cases | Crude RR | Adjusted RR <sup>a</sup> (95% CI) |
| None                 | 346                   | 138          | 1.00     | 1.00 (Ref.)                       | 163                                     | 66           | 1.00     | 1.00 (Ref.)                       |
| Mother               | 424                   | 147          | 0.88     | 0.90 (0.75-1.07)                  | 214                                     | 62           | 0.73     | 0.74 (0.56-0.98)                  |
| Father               | 272                   | 97           | 0.90     | 0.91 (0.74-1.12)                  | 127                                     | 40           | 0.77     | 0.78 (0.57-1.05)                  |

|      |     |     |             |      |     |    |             |      |
|------|-----|-----|-------------|------|-----|----|-------------|------|
| Both | 487 | 158 | 0.82        | 0.83 | 271 | 76 | 0.69        | 0.71 |
|      |     |     | (0.69-0.99) |      |     |    | (0.54-0.94) |      |

CI, confidence interval

<sup>a</sup>Adjusted for age, sex, BMI, smoking, leisure time physical activity, education and HADS score.

### Physical activity

In the stratified analysis for physical activity, there was no strong evidence of effect modification for either physically active offspring (RR: 0.78; 95% CI: 0.62, 0.98), or physically inactive offspring (RR: 0.98; 95% CI: 0.71, 1.36) (Table 3). Tests of statistical interaction indicate no departure from neither multiplicative ( $p = 0.037$ ) nor additive effects (RERI 0.19, 95% CI, -0.17, 0.55), data not shown.

Table 3. Relative risk (RR) of recovery from spinal pain in adult offspring associated with parental spinal pain; analysis stratified by leisure time physical activity.

|                      | Physically active |              |                                   | Physical inactive |              |                                   |
|----------------------|-------------------|--------------|-----------------------------------|-------------------|--------------|-----------------------------------|
|                      | No. of persons    | No. of cases | Adjusted RR <sup>a</sup> (95% CI) | No. of persons    | No. of cases | Adjusted RR <sup>a</sup> (95% CI) |
| Parental spinal pain |                   |              |                                   |                   |              |                                   |
| None                 | 229               | 97           | 1.00 (Ref.)                       | 111               | 40           | 1.00 (Ref.)                       |
| Mother or father     | 434               | 163          | 0.94 (0.77-1.14)                  | 246               | 74           | 0.82 (0.60-1.11)                  |
| Both parents         | 314               | 100          | 0.78 (0.62-0.98)                  | 166               | 58           | 0.98 (0.71-1.35)                  |

CI: confidence interval

aAdjusted for age, sex, BMI, smoking, education and HADS score.

### Body mass index

In the stratified analysis for body mass index, there was no strong evidence of effect modification. However, offspring who were overweight or obese had the lowest probability of recovery if both parents report activity limiting spinal pain or chronic spinal pain (RR: 0.57; 95% CI: 0.39, 0.84 and RR: 0.79; 95% CI: 0.61, 1.03 respectively) compared to normal weight (Table 4). In addition, there was no evidence of statistical interaction neither on the additive (estimates of RERI for chronic spinal pain and activity limiting spinal pain were -0.04; 95% CI: -0.38, 0.30 and -0.34; 95% CI: -0.91, 0.23, respectively) nor on the multiplicative scale ( $p = 0.131$  and  $p = 0.048$ , respectively).

Table 4. Relative risk (RR) of recovery from spinal pain and activity limiting spinal pain in adult offspring associated with parental spinal pain; analysis stratified by BMI.

| Variables             | Normal weight  |              |                                   | Overweight/obese |              |                                   |
|-----------------------|----------------|--------------|-----------------------------------|------------------|--------------|-----------------------------------|
|                       | No. of persons | No. of cases | Adjusted RR <sup>a</sup> (95% CI) | No. of persons   | No. of cases | Adjusted RR <sup>a</sup> (95% CI) |
| Offspring spinal pain |                |              |                                   |                  |              |                                   |
| Parental spinal pain  |                |              |                                   |                  |              |                                   |
| None                  | 168            | 68           | 1.00 (Ref.)                       | 177              | 69           | 1.00 (Ref.)                       |
| Mother or father      | 316            | 111          | 0.88<br>(0.70-1.12)               | 380              | 133          | 0.89<br>(0.70-1.12)               |

|                                         |     |    |             |     |    |             |
|-----------------------------------------|-----|----|-------------|-----|----|-------------|
| Both parents                            | 242 | 82 | 0.86        | 242 | 76 | 0.79        |
|                                         |     |    | (0.66-1.11) |     |    | (0.61-1.03) |
| Offspring activity limiting spinal pain |     |    |             |     |    |             |
| Parental spinal pain                    |     |    |             |     |    |             |
| None                                    | 86  | 34 | 1.00 (Ref.) | 130 | 50 | 1.00 (Ref.) |
| Mother or father                        | 151 | 42 | 0.72        | 301 | 98 | 0.72        |
|                                         |     |    | (0.49-1.04) |     |    | (0.51-0.99) |
| Both parents                            | 129 | 41 | 0.84        | 188 | 52 | 0.57        |
|                                         |     |    | (0.57-1.24) |     |    | (0.39-0.84) |

CI: confidence interval.

aAdjusted for age, sex, leisure physical activity, smoking, education and depression.

## DISCUSSION

### Summary of findings

The findings of this large population-based prospective family-linkage study indicate that offspring with both parents reporting chronic spinal pain are less likely to recover from chronic spinal pain and activity limiting spinal pain compared with offspring with no parent with spinal pain. Overall, there was no strong evidence that physical activity or body mass index modified these associations, although the results suggest that the inverse association between parental spinal pain and recovery from activity limiting spinal pain was strongest among offspring with a high BMI. This study supports the evidence from twin studies that genetics potentially influences recovery from chronic spinal pain,[30] but these intergenerational associations incorporate



1  
2  
3 shared environmental factors and shared beliefs that could influence recovery. For instance, there  
4  
5 is evidence showing that negative beliefs about pain and negative expectations about recovery  
6  
7 predict chronic and disabling spinal pain.[31-33] It seems clear that it is important to consider the  
8  
9 family history of chronic spinal pain as well as lifestyle behaviours when identifying people at  
10  
11 higher risk of non-recovery.  
12  
13  
14  
15  
16

### 17 **Comparison of findings with previous research**

18  
19 A recent systematic review showed that offspring of parents with chronic pain have poorer  
20  
21 outcomes regarding pain, general health, psychological, and family functioning as compared to  
22  
23 offspring of parents without pain.[34] The inter-generational transmission of spinal pain could be  
24  
25 explained by genetic heritability [35, 36] or a family shared environment.[37-40] Moreover, it  
26  
27 has been suggested that the genetic influence is greater in more disabling pain conditions, such as  
28  
29 chronic widespread pain and chronic activity limiting spinal pain, rather than in acute or sub-  
30  
31 acute non-debilitating pain.[35, 36] It is widely accepted that lifestyle factors, such as physical  
32  
33 activity and body weight, also play a significant role in the prognosis of chronic musculoskeletal  
34  
35 pain.[41]  
36  
37  
38  
39  
40  
41

42 Some studies have suggested that people with chronic back pain who regularly engage in leisure  
43  
44 time physical activity have better prognosis measured in terms of pain, disability, and quality of  
45  
46 life than those who are sedentary.[18, 42] However, there remains conflicting evidence regarding  
47  
48 how physical activity influences the prognosis of spinal pain,[43] with studies demonstrating that  
49  
50 both low and high levels of physical activity can negatively influence the prognosis of spinal  
51  
52 pain.[44, 45] For instance, a study found that high leisure time physical activity was related to  
53  
54  
55  
56  
57  
58  
59  
60

1  
2  
3 decreased prevalence of low back pain.[46] Whereas another study found that either high or low  
4 levels of leisure time physical activity was related to increased prevalence of low back pain.[44]  
5  
6 In contrast, a prospective study did not find any significant association between moderate/high  
7 levels of leisure physical activity and low back pain in young adults.[47] Another follow-up  
8 study found that regular habits of leisure physical activity have no effect on recovery from low  
9 back pain.[48] The inconsistency in the literature is possibly attributed to the diverse definitions  
10 and classifications of levels of physical activity. If such divergent associations with leisure time  
11 physical activity exist this could mask a possible modifying effect of physical activity in our  
12 analyses.  
13  
14  
15  
16  
17  
18  
19  
20  
21  
22  
23  
24  
25

26 The literature has provided evidence that obesity is associated with poor outcomes in people with  
27 chronic widespread pain,[49, 50] as well as chronic spinal pain [18, 51, 52] and also decreases  
28 the probability of recovery from chronic spinal pain regardless of the care they receive,[14]  
29 however, whether BMI could modify [19] the relationship between parental spinal pain on  
30 offspring recovery from chronic spinal pain has not been investigated before. Our results suggest  
31 that offspring BMI may modify on the parent-offspring association of spinal pain, with  
32 somewhat stronger associations among offspring who were classified as overweight or obese  
33 than those who were underweight or normal weight. Research has shown that inter-individual  
34 differences in pain sensitivity and endogenous pain-inhibitory capacity could reflect variations in  
35 the inherent susceptibility for chronic pain,[53, 54] but that a triggering exposure is required for  
36 the development of chronic pain.[55, 56] This could suggest that a possible genetic susceptibility  
37 for poor recovery from chronic pain [57, 58] as a higher penetrance between offspring who are  
38 overweight or obese.  
39  
40  
41  
42  
43  
44  
45  
46  
47  
48  
49  
50  
51  
52  
53  
54  
55  
56  
57  
58  
59  
60

## Strengths and limitations

This study has several strengths including the prospective design utilising a large population-based sample with a long follow-up period. In addition, the registry based information on family relations allowed us to include information on chronic spinal pain obtained from parents and offspring independently and at different time points. An important aspect is that the offspring were adults at the time of data collection, indicating that the parent-to-offspring association of chronic spinal pain persists into adulthood when the offspring most likely live apart from their parents. Furthermore, we were able to adjust for several offspring characteristics that could confound the parent-offspring associations of chronic spinal pain, such as age,[59] BMI,[52] leisure physical activity,[60] smoking,[59] depression [59] and education.[36, 61] However, we cannot exclude the possible residual confounding attributable to unknown or unmeasured factors.

There are some limitations that should be taken into account. Firstly, information on chronic spinal pain was only reported at baseline and follow-up 10-11 years later, with no information on possible changes in chronic spinal pain during the follow-up period. Consequently, recovery measured at follow-up could have been related to another episode of chronic spinal pain rather than the one reported at baseline. However, it is unlikely that this was differential between offspring with parents who reported chronic spinal pain and those who did not. Likewise, information on leisure time physical activity and BMI was only assessed at baseline, with no information on possible changes during the follow-up period. Secondly, although the questions about leisure time physical activity used in this study have been reported to have good reliability and provide useful measures of leisure physical activity,[62] subjective interpretations of the

1  
2  
3 activity questions could have influenced the results. Besides, it is well known that self-reports  
4 may lead to under or overestimation of the variables of interest.[63] Thirdly, a premise for  
5 inclusion into this study was that the mother, father and offspring all had to participate in the  
6 health survey. To some extent, this may have resulted in a selected and more health conscious  
7 sample than the general population. Nevertheless, it is questionable whether representativeness is  
8 a prerequisite for making valid risk assessments in epidemiological studies.[57]  
9  
10  
11  
12  
13  
14  
15  
16  
17  
18

## 19 **CONCLUSION**

20  
21 Offspring with chronic spinal pain are less likely to recover if they have parents with chronic  
22 spinal pain compared to offspring without parental chronic spinal pain. This association is  
23 stronger when the offspring present pain that interferes with their usual work and leisure  
24 activities (activity limiting spinal pain). The inverse association between parental chronic spinal  
25 pain on recovery was somewhat stronger among offspring who were overweight or obese. The  
26 association between parental chronic spinal pain and the prognosis of chronic spinal pain in the  
27 adult offspring underlines the importance of identifying those at high risk of non-recovery since  
28 they account for significant social and individual financial burden. Therefore, clinicians should  
29 consider family history of spinal pain when implementing strategies to improve recovery from  
30 chronic spinal pain, chronic spinal pain. For instance, the assessment of the potential risks of  
31 physical activity and education about the range of benefits, as well as highlights the importance  
32 of maintenance of a normal body weight.  
33  
34  
35  
36  
37  
38  
39  
40  
41  
42  
43  
44  
45  
46  
47  
48  
49  
50

## 51 **Acknowledgements**

52  
53 The HUNT Study is collaboration between the HUNT Research Centre (Faculty of Medicine,  
54  
55  
56  
57  
58  
59  
60

1  
2  
3 Norwegian University of Science and Technology (NTNU), Nord-Trøndelag County Council,  
4  
5 Central Norway Regional Health Authority, and the Norwegian Institute of Public Health. ABA  
6  
7 holds the International Post-graduate Research Scholarship “Science without Borders” award  
8  
9 from the Brazilian Government. PHF is funded by a NHMRC Research Fellowship and  
10  
11 University of Sydney SOAR Fellowship. MLF holds a MRFF/NHMRC Career Development  
12  
13 Fellowship and is a Sydney Medical Foundation Fellow.  
14  
15

16  
17  
18  
19 **Competing Interests:** None declared  
20  
21

22  
23  
24 **Funding Statement:** This research was supported by a grant from the Department of Public  
25  
26 Health and Nursing, Norwegian University of Science and Technology, Trondheim, Norway.  
27  
28 However, this funding source had no role in the study’s design, data collection, analysis,  
29  
30 interpretation of the data, or the decision to submit the paper for publication.  
31  
32

### 33 34 35 **Author Contributions** 36

37 All authors critically revised the manuscript for important intellectual content and approved the  
38  
39 final manuscript. Please find below a detailed description of the role of each author:  
40  
41

- 42  
43 - Anita B Amorim: conception and design, analysis and interpretation of data, drafting and  
44  
45 revision of the manuscript, and final approval of the version to be published.  
46  
47
- 48 - Paulo H Ferreira: conception and design, interpretation of data, drafting and revision of  
49  
50 the manuscript, and final approval of the version to be published.  
51  
52
- 53 - Manuela L Ferreira: conception and design, drafting and revision of the manuscript, and  
54  
55 final approval of the version to be published.  
56  
57

- 1  
2  
3 - Ragnhild Lier: conception and design, drafting and revision of the manuscript, and final  
4 approval of the version to be published.  
5  
6  
7 - Milena Simic: conception and design, drafting and revision of the manuscript, and final  
8 approval of the version to be published.  
9  
10  
11  
12 - Evangelos Pappas: conception and design, drafting and revision of the manuscript, and  
13 final approval of the version to be published.  
14  
15  
16 - Joshua R Zadro: conception and design, interpretation of data, drafting and revision of  
17 the manuscript, and final approval of the version to be published.  
18  
19  
20 - Paul Jarle Mork: conception and design, acquisition and interpretation of data, drafting  
21 and revision of the manuscript and final approval of the version to be published.  
22  
23  
24 - Tom Ivar Lund Nilsen: conception and design, acquisition and interpretation of data,  
25 drafting and revision of the manuscript and final approval of the version to be published.  
26  
27  
28  
29  
30  
31  
32  
33  
34  
35  
36  
37  
38  
39  
40  
41  
42  
43  
44  
45  
46  
47  
48  
49  
50  
51  
52  
53  
54  
55  
56  
57  
58  
59  
60

view only

## REFERENCES

1. Mortality, G.B.D. and C. Causes of Death, *Global, regional, and national life expectancy, all-cause mortality, and cause-specific mortality for 249 causes of death, 1980-2015: a systematic analysis for the Global Burden of Disease Study 2015*. Lancet, 2016. **388**(10053): p. 1459-1544.
2. Vasseljen, O., et al., *Natural course of acute neck and low back pain in the general population: the HUNT study*. Pain, 2013. **154**(8): p. 1237-44.
3. Croft, P.R., et al., *Outcome of low back pain in general practice: a prospective study*. BMJ, 1998. **316**(7141): p. 1356-9.
4. Itz, C.J., et al., *Clinical course of non-specific low back pain: a systematic review of prospective cohort studies set in primary care*. Eur J Pain, 2013. **17**(1): p. 5-15.
5. Kent, P.M. and J.L. Keating, *Can we predict poor recovery from recent-onset nonspecific low back pain? A systematic review*. Man Ther, 2008. **13**(1): p. 12-28.
6. Gore, M., et al., *The burden of chronic low back pain: clinical comorbidities, treatment patterns, and health care costs in usual care settings*. Spine (Phila Pa 1976), 2012. **37**(11): p. E668-77.
7. Hoftun, G.B., P.R. Romundstad, and M. Rygg, *Association of parental chronic pain with chronic pain in the adolescent and young adult: family linkage data from the HUNT Study*. JAMA Pediatr, 2013. **167**(1): p. 61-9.
8. Lier, R., T.I. Nilsen, and P.J. Mork, *Parental chronic pain in relation to chronic pain in their adult offspring: family-linkage within the HUNT Study, Norway*. BMC Public Health, 2014. **14**: p. 797.

- 1  
2  
3 9. Luchting, B., et al., *Expression of miRNA-124a in CD4 Cells Reflects Response to a*  
4  
5 *Multidisciplinary Treatment Program in Patients With Chronic Low Back Pain.* Spine  
6  
7 (Phila Pa 1976), 2017. **42**(4): p. E226-E233.  
8  
9
- 10 10. Blangsted, A.K., et al., *One-year randomized controlled trial with different physical-*  
11  
12 *activity programs to reduce musculoskeletal symptoms in the neck and shoulders among*  
13  
14 *office workers.* Scand J Work Environ Health, 2008. **34**(1): p. 55-65.  
15  
16
- 17 11. Linton, S.J. and M.W. van Tulder, *Preventive interventions for back and neck pain*  
18  
19 *problems: what is the evidence?* Spine (Phila Pa 1976), 2001. **26**(7): p. 778-87.  
20  
21
- 22 12. van den Heuvel, S.G., et al., *The effect of physical activity in leisure time on neck and*  
23  
24 *upper limb symptoms.* Prev Med, 2005. **41**(1): p. 260-7.  
25  
26
- 27 13. Krismer, M., et al., *Strategies for prevention and management of musculoskeletal*  
28  
29 *conditions. Low back pain (non-specific).* Best Pract Res Clin Rheumatol, 2007. **21**(1): p.  
30  
31 77-91.  
32
- 33 14. Ewald, S.C., E.L. Hurwitz, and A. Kizhakkeveetil, *The effect of obesity on treatment*  
34  
35 *outcomes for low back pain.* Chiropr Man Therap, 2016. **24**: p. 48.  
36  
37
- 38 15. Krokstad, S., et al., *Cohort Profile: the HUNT Study, Norway.* Int J Epidemiol, 2013.  
39  
40 **42**(4): p. 968-77.  
41
- 42 16. Langhammer, A., et al., *The HUNT study: participation is associated with survival and*  
43  
44 *depends on socioeconomic status, diseases and symptoms.* BMC Med Res Methodol,  
45  
46 2012. **12**: p. 143.  
47  
48
- 49 17. Kuorinka, I., et al., *Standardised Nordic questionnaires for the analysis of*  
50  
51 *musculoskeletal symptoms.* Appl Ergon, 1987. **18**(3): p. 233-7.  
52  
53  
54  
55  
56  
57  
58  
59  
60



- 1  
2  
3 18. Nilsen, T.I., A. Holtermann, and P.J. Mork, *Physical exercise, body mass index, and risk*  
4 *of chronic pain in the low back and neck/shoulders: longitudinal data from the Nord-*  
5 *Trondelag Health Study*. Am J Epidemiol, 2011. **174**(3): p. 267-73.  
6  
7  
8  
9  
10 19. Lier, R., et al., *Familial Risk of Chronic Musculoskeletal Pain and the Importance of*  
11 *Physical Activity and Body Mass Index: Prospective Data from the HUNT Study,*  
12 *Norway*. PLoS One, 2016. **11**(4): p. e0153828.  
13  
14  
15  
16  
17 20. *Physical status: The Use and Interpretation of Anthropometry. Report of a WHO Expert*  
18 *Committee.*  
19  
20  
21  
22 (*WHO Technical Report Series no. 854*). , W.T.R.S.n. 854). Editor. 1995: Geneva: World Health  
23 Organization.  
24  
25  
26  
27 21. Altman, D.G., et al., *Prognosis and prognostic research: validating a prognostic model.*  
28 BMJ, 2009. **338**: p. b605.  
29  
30  
31 22. Moons, K.G., et al., *Prognosis and prognostic research: application and impact of*  
32 *prognostic models in clinical practice*. BMJ, 2009. **338**: p. b606.  
33  
34  
35  
36 23. Moons, K.G., et al., *Prognosis and prognostic research: what, why, and how?* BMJ,  
37 2009. **338**: p. b375.  
38  
39  
40  
41 24. Royston, P., et al., *Prognosis and prognostic research: Developing a prognostic model.*  
42 BMJ, 2009. **338**: p. b604.  
43  
44  
45 25. Martin, R.M., et al., *Parents' growth in childhood and the birth weight of their offspring.*  
46 Epidemiology, 2004. **15**(3): p. 308-16.  
47  
48  
49  
50 26. Andersson, T., et al., *Calculating measures of biological interaction*. Eur J Epidemiol,  
51 2005. **20**(7): p. 575-9.  
52  
53  
54  
55  
56  
57  
58  
59  
60

- 1  
2  
3 27. Snaith, R.P., *The Hospital Anxiety And Depression Scale*. Health Qual Life Outcomes,  
4 2003. **1**: p. 29.  
5  
6  
7  
8 28. Bjelland, I., et al., *The validity of the Hospital Anxiety and Depression Scale. An updated*  
9 *literature review*. J Psychosom Res, 2002. **52**(2): p. 69-77.  
10  
11  
12 29. Zigmond, A.S. and R.P. Snaith, *The hospital anxiety and depression scale*. Acta  
13 Psychiatr Scand, 1983. **67**(6): p. 361-70.  
14  
15  
16 30. Zadro, J.R., et al., *Does Familial Aggregation of Chronic Low Back Pain Affect*  
17 *Recovery?: A Population-Based Twin Study*. Spine (Phila Pa 1976), 2017. **42**(17): p.  
18 1295-1301.  
19  
20  
21  
22  
23 31. Urquhart, D.M., et al., *Negative beliefs about low back pain are associated with high*  
24 *pain intensity and high level disability in community-based women*. BMC Musculoskelet  
25 Disord, 2008. **9**: p. 148.  
26  
27  
28  
29 32. Wertli, M.M., et al., *Catastrophizing-a prognostic factor for outcome in patients with low*  
30 *back pain: a systematic review*. Spine J, 2014. **14**(11): p. 2639-57.  
31  
32  
33 33. Fujii, T., K. Matsudaira, and H. Oka, *Factors associated with fear-avoidance beliefs*  
34 *about low back pain*. J Orthop Sci, 2013. **18**(6): p. 909-15.  
35  
36  
37  
38 34. Higgins, K.S., et al., *Offspring of parents with chronic pain: a systematic review and*  
39 *meta-analysis of pain, health, psychological, and family outcomes*. Pain, 2015. **156**(11):  
40 p. 2256-66.  
41  
42  
43  
44 35. Kato, K., et al., *Importance of genetic influences on chronic widespread pain*. Arthritis  
45 Rheum, 2006. **54**(5): p. 1682-6.  
46  
47  
48  
49 36. Hocking, L.J., et al., *Heritability of chronic pain in 2195 extended families*. Eur J Pain,  
50 2012. **16**(7): p. 1053-63.  
51  
52  
53  
54  
55  
56  
57  
58  
59  
60

- 1  
2  
3 37. Violon, A. and D. Giurgea, *Familial models for chronic pain*. Pain, 1984. **18**(2): p. 199-  
4 203.  
5  
6  
7 38. Pollard, C.A., *Family history and severity of disability associated with chronic low back*  
8 *pain*. Psychol Rep, 1985. **57**(3 Pt 1): p. 813-4.  
9  
10  
11 39. Payne, B. and M.A. Norfleet, *Chronic pain and the family: a review*. Pain, 1986. **26**(1): p.  
12 1-22.  
13  
14  
15 40. Bruehl, S., et al., *How accurate are parental chronic pain histories provided by*  
16 *offspring?* Pain, 2005. **115**(3): p. 390-7.  
17  
18  
19 41. Dean, E. and A. Soderlund, *What is the role of lifestyle behaviour change associated with*  
20 *non-communicable disease risk in managing musculoskeletal health conditions with*  
21 *special reference to chronic pain?* BMC Musculoskelet Disord, 2015. **16**: p. 87.  
22  
23  
24 42. Pinto, R.Z., et al., *Self-reported moderate-to-vigorous leisure time physical activity*  
25 *predicts less pain and disability over 12 months in chronic and persistent low back pain*.  
26 Eur J Pain, 2014. **18**(8): p. 1190-8.  
27  
28  
29 43. Sitthipornvorakul, E., et al., *The association between physical activity and neck and low*  
30 *back pain: a systematic review*. Eur Spine J, 2011. **20**(5): p. 677-89.  
31  
32  
33 44. Heneweer, H., L. Vanhees, and H.S. Picavet, *Physical activity and low back pain: a U-*  
34 *shaped relation?* Pain, 2009. **143**(1-2): p. 21-5.  
35  
36  
37 45. Heneweer, H., et al., *Physical activity and low back pain: a systematic review of recent*  
38 *literature*. Eur Spine J, 2011. **20**(6): p. 826-45.  
39  
40  
41 46. Hartvigsen, J. and K. Christensen, *Active lifestyle protects against incident low back pain*  
42 *in seniors: a population-based 2-year prospective study of 1387 Danish twins aged 70-*  
43 *100 years*. Spine (Phila Pa 1976), 2007. **32**(1): p. 76-81.  
44  
45  
46  
47  
48  
49  
50  
51  
52  
53  
54  
55  
56  
57  
58  
59  
60

- 1  
2  
3 47. Lunde, L.K., et al., *Low back pain and physical activity--A 6.5 year follow-up among*  
4 *young adults in their transition from school to working life.* BMC Public Health, 2015.  
5  
6 **15**: p. 1115.  
7  
8  
9  
10 48. Mortimer, M., G. Pernold, and C. Wiktorin, *Low back pain in a general population.*  
11 *Natural course and influence of physical exercise--a 5-year follow-up of the*  
12 *Musculoskeletal Intervention Center-Norrtalje Study.* Spine (Phila Pa 1976), 2006.  
13  
14 **31**(26): p. 3045-51.  
15  
16  
17  
18  
19 49. Magnusson, K., K.B. Hagen, and B. Natvig, *Individual and joint effects of risk factors for*  
20 *onset widespread pain and obesity - a population-based prospective cohort study.* Eur J  
21  
22 Pain, 2016. **20**(7): p. 1102-10.  
23  
24  
25  
26 50. Mundal, I., et al., *Prevalence and long-term predictors of persistent chronic widespread*  
27 *pain in the general population in an 11-year prospective study: the HUNT study.* BMC  
28  
29 Musculoskelet Disord, 2014. **15**: p. 213.  
30  
31  
32  
33 51. Mork, P.J., et al., *Sleep problems, exercise and obesity and risk of chronic*  
34 *musculoskeletal pain: the Norwegian HUNT study.* Eur J Public Health, 2014. **24**(6): p.  
35  
36 924-9.  
37  
38  
39  
40 52. Ray, L., et al., *Mechanisms of association between obesity and chronic pain in the*  
41 *elderly.* Pain, 2011. **152**(1): p. 53-9.  
42  
43  
44  
45 53. Edwards, R.R., *Individual differences in endogenous pain modulation as a risk factor for*  
46 *chronic pain.* Neurology, 2005. **65**(3): p. 437-43.  
47  
48  
49 54. Bradley, L.A., *Pathophysiologic mechanisms of fibromyalgia and its related disorders.* J  
50  
51 Clin Psychiatry, 2008. **69 Suppl 2**: p. 6-13.  
52  
53  
54  
55  
56  
57  
58  
59  
60

- 1  
2  
3 55. Buskila, D. and L. Neumann, *Genetics of fibromyalgia*. *Curr Pain Headache Rep*, 2005.  
4  
5 **9**(5): p. 313-5.  
6  
7  
8 56. Mogil, J.S., *Pain genetics: past, present and future*. *Trends Genet*, 2012. **28**(6): p. 258-  
9  
10 66.  
11  
12 57. Pollard, T.C., et al., *Genetic predisposition to the presence and 5-year clinical*  
13  
14 *progression of hip osteoarthritis*. *Osteoarthritis Cartilage*, 2012. **20**(5): p. 368-75.  
15  
16  
17 58. Holliday, K.L. and J. McBeth, *Recent advances in the understanding of genetic*  
18  
19 *susceptibility to chronic pain and somatic symptoms*. *Curr Rheumatol Rep*, 2011. **13**(6):  
20  
21 p. 521-7.  
22  
23  
24 59. Cimmino, M.A., C. Ferrone, and M. Cutolo, *Epidemiology of chronic musculoskeletal*  
25  
26 *pain*. *Best Pract Res Clin Rheumatol*, 2011. **25**(2): p. 173-83.  
27  
28  
29 60. Holth, H.S., et al., *Physical inactivity is associated with chronic musculoskeletal*  
30  
31 *complaints 11 years later: results from the Nord-Trondelag Health Study*. *BMC*  
32  
33 *Musculoskelet Disord*, 2008. **9**: p. 159.  
34  
35  
36 61. Hagen, K., et al., *Low socioeconomic status is associated with chronic musculoskeletal*  
37  
38 *complaints among 46,901 adults in Norway*. *Scand J Public Health*, 2005. **33**(4): p. 268-  
39  
40 75.  
41  
42  
43 62. Kurtze, N., et al., *Reliability and validity of self-reported physical activity in the Nord-*  
44  
45 *Trondelag Health Study (HUNT 2)*. *Eur J Epidemiol*, 2007. **22**(6): p. 379-87.  
46  
47  
48 63. Ainsworth, B., et al., *The current state of physical activity assessment tools*. *Prog*  
49  
50 *Cardiovasc Dis*, 2015. **57**(4): p. 387-95.  
51  
52  
53  
54  
55  
56  
57  
58  
59  
60

# Reporting checklist for cohort study.

Based on the STROBE cohort guidelines.

## Instructions to authors

Complete this checklist by entering the page numbers from your manuscript where readers will find each of the items listed below.

Your article may not currently address all the items on the checklist. Please modify your text to include the missing information. If you are certain that an item does not apply, please write "n/a" and provide a short explanation.

Upload your completed checklist as an extra file when you submit to a journal.

In your methods section, say that you used the STROBE cohort reporting guidelines, and cite them as:

von Elm E, Altman DG, Egger M, Pocock SJ, Gøtzsche PC, Vandenbroucke JP. The Strengthening the Reporting of Observational Studies in Epidemiology (STROBE) Statement: guidelines for reporting observational studies.

|                        |     | Reporting Item                                                                                                                  | Page Number |
|------------------------|-----|---------------------------------------------------------------------------------------------------------------------------------|-------------|
| Title                  | #1a | Indicate the study's design with a commonly used term in the title or the abstract                                              | 1           |
| Abstract               | #1b | Provide in the abstract an informative and balanced summary of what was done and what was found                                 | 2           |
| Background / rationale | #2  | Explain the scientific background and rationale for the investigation being reported                                            | 4           |
| Objectives             | #3  | State specific objectives, including any prespecified hypotheses                                                                | 5           |
| Study design           | #4  | Present key elements of study design early in the paper                                                                         | 5           |
| Setting                | #5  | Describe the setting, locations, and relevant dates, including periods of recruitment, exposure, follow-up, and data collection | 5           |
| Eligibility criteria   | #6a | Give the eligibility criteria, and the sources and methods of selection of participants. Describe methods of follow-up.         | 5           |

|    |                  |      |                                                                   |          |
|----|------------------|------|-------------------------------------------------------------------|----------|
| 1  |                  | #6b  | For matched studies, give matching criteria and number of         | 6        |
| 2  |                  |      | exposed and unexposed                                             |          |
| 3  |                  |      |                                                                   |          |
| 4  |                  |      |                                                                   |          |
| 5  | Variables        | #7   | Clearly define all outcomes, exposures, predictors, potential     | 6, 7 and |
| 6  |                  |      | confounders, and effect modifiers. Give diagnostic criteria, if   | 8        |
| 7  |                  |      | applicable                                                        |          |
| 8  |                  |      |                                                                   |          |
| 9  |                  |      |                                                                   |          |
| 10 | Data sources /   | #8   | For each variable of interest give sources of data and details of | See note |
| 11 | measurement      |      | methods of assessment (measurement). Describe                     | 1        |
| 12 |                  |      | comparability of assessment methods if there is more than one     |          |
| 13 |                  |      | group. Give information separately for for exposed and            |          |
| 14 |                  |      | unexposed groups if applicable.                                   |          |
| 15 |                  |      |                                                                   |          |
| 16 |                  |      |                                                                   |          |
| 17 |                  |      |                                                                   |          |
| 18 | Bias             | #9   | Describe any efforts to address potential sources of bias         | 8        |
| 19 |                  |      |                                                                   |          |
| 20 |                  |      |                                                                   |          |
| 21 | Study size       | #10  | Explain how the study size was arrived at                         | 6        |
| 22 |                  |      |                                                                   |          |
| 23 | Quantitative     | #11  | Explain how quantitative variables were handled in the            | 8        |
| 24 | variables        |      | analyses. If applicable, describe which groupings were chosen,    |          |
| 25 |                  |      | and why                                                           |          |
| 26 |                  |      |                                                                   |          |
| 27 |                  |      |                                                                   |          |
| 28 | Statistical      | #12a | Describe all statistical methods, including those used to control | 8 and 9  |
| 29 | methods          |      | for confounding                                                   |          |
| 30 |                  |      |                                                                   |          |
| 31 |                  |      |                                                                   |          |
| 32 |                  | #12b | Describe any methods used to examine subgroups and                | 8 and 9  |
| 33 |                  |      | interactions                                                      |          |
| 34 |                  |      |                                                                   |          |
| 35 |                  |      |                                                                   |          |
| 36 |                  | #12c | Explain how missing data were addressed                           | 8 and 9  |
| 37 |                  |      |                                                                   |          |
| 38 |                  | #12d | If applicable, explain how loss to follow-up was addressed        | 8 and 9  |
| 39 |                  |      |                                                                   |          |
| 40 |                  |      |                                                                   |          |
| 41 |                  | #12e | Describe any sensitivity analyses                                 | 8 and 9  |
| 42 |                  |      |                                                                   |          |
| 43 | Participants     | #13a | Report numbers of individuals at each stage of study—eg           | 9 and 10 |
| 44 |                  |      | numbers potentially eligible, examined for eligibility, confirmed |          |
| 45 |                  |      | eligible, included in the study, completing follow-up, and        |          |
| 46 |                  |      | analysed. Give information separately for for exposed and         |          |
| 47 |                  |      | unexposed groups if applicable.                                   |          |
| 48 |                  |      |                                                                   |          |
| 49 |                  |      |                                                                   |          |
| 50 |                  |      |                                                                   |          |
| 51 |                  | #13b | Give reasons for non-participation at each stage                  | 9 and 10 |
| 52 |                  |      |                                                                   |          |
| 53 |                  |      |                                                                   |          |
| 54 |                  | #13c | Consider use of a flow diagram                                    | n/a      |
| 55 |                  |      |                                                                   |          |
| 56 | Descriptive data | #14a | Give characteristics of study participants (eg demographic,       | 9 and 10 |
| 57 |                  |      | clinical, social) and information on exposures and potential      |          |
| 58 |                  |      |                                                                   |          |
| 59 |                  |      |                                                                   |          |
| 60 |                  |      |                                                                   |          |

|    |                  |                                                                        |          |
|----|------------------|------------------------------------------------------------------------|----------|
| 1  |                  | confounders. Give information separately for exposed and               |          |
| 2  |                  | unexposed groups if applicable.                                        |          |
| 3  |                  |                                                                        |          |
| 4  |                  | #14b Indicate number of participants with missing data for each        | n/a      |
| 5  |                  | variable of interest                                                   |          |
| 6  |                  |                                                                        |          |
| 7  |                  |                                                                        |          |
| 8  |                  | #14c Summarise follow-up time (eg, average and total amount)           | 9 and 10 |
| 9  |                  |                                                                        |          |
| 10 | Outcome data     | #15 Report numbers of outcome events or summary measures               | 10 and   |
| 11 |                  | over time. Give information separately for exposed and                 | 11       |
| 12 |                  | unexposed groups if applicable.                                        |          |
| 13 |                  |                                                                        |          |
| 14 |                  |                                                                        |          |
| 15 | Main results     | #16a Give unadjusted estimates and, if applicable, confounder-         | 10 and   |
| 16 |                  | adjusted estimates and their precision (eg, 95% confidence             | 11       |
| 17 |                  | interval). Make clear which confounders were adjusted for and          |          |
| 18 |                  | why they were included                                                 |          |
| 19 |                  |                                                                        |          |
| 20 |                  |                                                                        |          |
| 21 |                  |                                                                        |          |
| 22 |                  | #16b Report category boundaries when continuous variables were         | 10 and   |
| 23 |                  | categorized                                                            | 11       |
| 24 |                  |                                                                        |          |
| 25 |                  |                                                                        |          |
| 26 |                  | #16c If relevant, consider translating estimates of relative risk into | n/a      |
| 27 |                  | absolute risk for a meaningful time period                             |          |
| 28 |                  |                                                                        |          |
| 29 |                  |                                                                        |          |
| 30 | Other analyses   | #17 Report other analyses done—e.g., analyses of subgroups and         | 10 and   |
| 31 |                  | interactions, and sensitivity analyses                                 | 11       |
| 32 |                  |                                                                        |          |
| 33 |                  |                                                                        |          |
| 34 | Key results      | #18 Summarise key results with reference to study objectives           | 11 and   |
| 35 |                  |                                                                        | 12       |
| 36 |                  |                                                                        |          |
| 37 |                  |                                                                        |          |
| 38 | Limitations      | #19 Discuss limitations of the study, taking into account sources of   | 13       |
| 39 |                  | potential bias or imprecision. Discuss both direction and              |          |
| 40 |                  | magnitude of any potential bias.                                       |          |
| 41 |                  |                                                                        |          |
| 42 |                  |                                                                        |          |
| 43 | Interpretation   | #20 Give a cautious overall interpretation considering objectives,     | 13 and   |
| 44 |                  | limitations, multiplicity of analyses, results from similar studies,   | 14       |
| 45 |                  | and other relevant evidence.                                           |          |
| 46 |                  |                                                                        |          |
| 47 |                  |                                                                        |          |
| 48 | Generalisability | #21 Discuss the generalisability (external validity) of the study      | 13 and   |
| 49 |                  | results                                                                | 14       |
| 50 |                  |                                                                        |          |
| 51 |                  |                                                                        |          |
| 52 | Funding          | #22 Give the source of funding and the role of the funders for the     | 15 and   |
| 53 |                  | present study and, if applicable, for the original study on which      | 16       |
| 54 |                  | the present article is based                                           |          |
| 55 |                  |                                                                        |          |
| 56 |                  |                                                                        |          |
| 57 |                  |                                                                        |          |

## Author notes



1. 6, 7 and 8

The STROBE checklist is distributed under the terms of the Creative Commons Attribution License CC-BY. This checklist was completed on 02. March 2018 using <http://www.goodreports.org/>, a tool made by the [EQUATOR Network](#) in collaboration with [Penelope.ai](#)

For peer review only

# BMJ Open

## The influence of family history on prognosis of spinal pain and the role of leisure time physical activity and body mass index: family-linkage data from the Norwegian HUNT Study.

|                                 |                                                                                                                                                                                                                                                                                                                                                                                                                                                                                                                                                                                                                                                                                                                                                                                                                                                      |
|---------------------------------|------------------------------------------------------------------------------------------------------------------------------------------------------------------------------------------------------------------------------------------------------------------------------------------------------------------------------------------------------------------------------------------------------------------------------------------------------------------------------------------------------------------------------------------------------------------------------------------------------------------------------------------------------------------------------------------------------------------------------------------------------------------------------------------------------------------------------------------------------|
| Journal:                        | <i>BMJ Open</i>                                                                                                                                                                                                                                                                                                                                                                                                                                                                                                                                                                                                                                                                                                                                                                                                                                      |
| Manuscript ID                   | bmjopen-2018-022785.R1                                                                                                                                                                                                                                                                                                                                                                                                                                                                                                                                                                                                                                                                                                                                                                                                                               |
| Article Type:                   | Research                                                                                                                                                                                                                                                                                                                                                                                                                                                                                                                                                                                                                                                                                                                                                                                                                                             |
| Date Submitted by the Author:   | 21-Jun-2018                                                                                                                                                                                                                                                                                                                                                                                                                                                                                                                                                                                                                                                                                                                                                                                                                                          |
| Complete List of Authors:       | Amorim, Anita; The University of Sydney, Faculty of Health Sciences<br>Ferreira, Paulo; University of Sydney, Faculty of Health Science<br>Ferreira, Manuela; University of Sydney Institute of Bone and Joint Research,<br>Lier, Ragnhild; NTNU Det Medisinske Fakultet DMF, Department of Public Health and General Practice<br>Simic, Milena; The University of Sydney, Physiotherapy<br>Pappas, Evangelos; University of Sydney, Discipline of Physiotherapy, Faculty of Health Sciences; University of Sydney<br>Zadro, Joshua; University of Sydney, Faculty of Health Science<br>Mork, Paul Jarle; Norges teknisk-naturvitenskapelige universitet, Department of Public Health and Nursing; Norwegian University of Science and Technology<br>Nilsen, Tom; NTNU Det Medisinske Fakultet DMF, Department of Public Health and General Practice |
| <b>Primary Subject Heading</b>: | Epidemiology                                                                                                                                                                                                                                                                                                                                                                                                                                                                                                                                                                                                                                                                                                                                                                                                                                         |
| Secondary Subject Heading:      | Genetics and genomics, Epidemiology, Public health                                                                                                                                                                                                                                                                                                                                                                                                                                                                                                                                                                                                                                                                                                                                                                                                   |
| Keywords:                       | Low back pain, neck pain, chronic pain, obesity, family study, physical activity                                                                                                                                                                                                                                                                                                                                                                                                                                                                                                                                                                                                                                                                                                                                                                     |
|                                 |                                                                                                                                                                                                                                                                                                                                                                                                                                                                                                                                                                                                                                                                                                                                                                                                                                                      |

SCHOLARONE™  
Manuscripts

1  
2  
3 **The influence of family history on prognosis of spinal pain and the role of leisure time**  
4 **physical activity and body mass index: family-linkage data from the Norwegian HUNT**  
5 **Study.**  
6  
7  
8  
9

10  
11  
12 Anita B. Amorim<sup>1</sup>; Paulo H. Ferreira<sup>1</sup>; Manuela L. Ferreira<sup>2</sup>; Ragnhild Lier<sup>3</sup>; Milena Simic<sup>1</sup>;  
13  
14 Evangelos Pappas<sup>1</sup>; Joshua R. Zadro<sup>1</sup>; Paul Jarle Mork<sup>3</sup>; Tom Ivar Lund Nilsen<sup>3,4\*</sup>  
15  
16  
17  
18

19 <sup>1</sup> The University of Sydney, Discipline of Physiotherapy, Faculty of Health Sciences, Sydney,  
20  
21 NSW, Australia.  
22

23 <sup>2</sup> Institute of Bone and Joint Research, The Kolling Institute, Sydney Medical School, Sydney,  
24  
25 Australia  
26

27 <sup>3</sup> Department of Public Health and Nursing, Norwegian University of Science and Technology,  
28  
29 Trondheim, Norway  
30  
31

32 <sup>4</sup> Clinic of Anaesthesia and Intensive Care, St Olavs Hospital, Trondheim University Hospital,  
33  
34 Trondheim, Norway  
35  
36

37  
38  
39  
40 \*Corresponding author: Tom Ivar Lund Nilsen – NTNU Det Medisinske Fakultet DMF,  
41  
42 Department of Public Health and General Practice, Norwegian University of Science and  
43  
44 Technology, Trondheim, Norway  
45

46 Telephone: +47 73598224/ email: tom.nilsen@ntnu.no  
47  
48  
49

50  
51 Word count: 3,841  
52  
53  
54  
55  
56  
57  
58  
59  
60

## ABSTRACT

**Objectives:** To investigate the influence of parental chronic spinal pain on prognosis of chronic spinal pain in adult offspring, and whether offspring physical activity level and body mass index (BMI) modified this association.

**Design:** Prospective cohort study.

**Setting:** We used family linked longitudinal data from the Norwegian HUNT study collected in HUNT2 (1995-97) and HUNT3 (2006-08).

**Participants:** A total of 1,529 offspring who reported spinal pain in HUNT2 were linked with parental data and followed-up in HUNT3.

**Outcomes:** We estimated relative risk (RR) with 95% confidence intervals (CIs) for recovery from chronic spinal pain, and also from activity limiting spinal pain, in offspring related to chronic spinal pain in parents. We also investigated whether offspring leisure time physical activity and BMI modified these intergenerational associations in spinal pain.

**Results:** Offspring with both parents reporting chronic spinal pain were less likely to recover from chronic spinal pain (RR: 0.83, 95% CI: 0.69, 0.99) and activity limiting spinal pain (RR: 0.71, 95% CI: 0.54, 0.94), compared to offspring of parents without chronic spinal pain.

Analyses stratified by BMI and physical activity showed no strong evidence of effect modification on these associations. However, offspring who were overweight/obese and with both parents reporting spinal pain had particularly low probability of recovery from activity limiting spinal pain, compared those who were normal weight and had parents without spinal pain (RR: 0.57, 95% CI: 0.39-0.84).

**Conclusion:** Offspring with chronic spinal pain are less likely to recover if they have parents with chronic spinal pain, particularly if offspring are overweight/obese.

1  
2  
3  
4  
5 **Key words:** Low back pain, neck pain, chronic pain, obesity, family study, physical activity.  
6  
7  
8  
9

### 10 **Strengths and limitations of this study**

- 12 • The HUNT Study is a large population-based health study with longitudinal data that  
13 allows prospective analysis on the prognosis of chronic spinal pain.  
14
- 15 • Chronic spinal pain was independently reported in parents and offspring; family relations  
16 was informed by a linkage with a national registry; and the data allowed us to control for  
17 a wide range of potential confounders.  
18
- 19 • Information on pain status, physical activity, and body mass index was not updated  
20 throughout the follow-up period.  
21  
22  
23  
24  
25  
26  
27  
28  
29  
30  
31  
32  
33  
34  
35  
36  
37  
38  
39  
40  
41  
42  
43  
44  
45  
46  
47  
48  
49  
50  
51  
52  
53  
54  
55  
56  
57  
58  
59  
60

## INTRODUCTION

Spinal pain that includes low back and neck pain is highly prevalent and a common cause of disability worldwide.[1] The natural history of spinal pain is extremely variable and may last a few days or persist for many years.[2] A substantial proportion of patients recover within the first three months of a spinal pain episode, but around three quarters of the remaining patients are likely to experience pain one year after onset.[3, 4] People who fail to recover in the first few months following an acute episode are at greater risk of poor prognosis.[5] Spinal pain, especially in its chronic and disabling form, could be a significant personal and financial burden,[6] and may also influence families and society.[1] It is therefore vital to identify factors that influence prognosis of spinal pain, which in turn can inform preventive interventions to reduce chronicity.

Family studies have suggested that chronic pain aggregate in families,[7, 8] with the parent-offspring transmission of chronic pain explained by genetic heritability[9, 10] and shared environment factors.[11-14] The mean heritability of chronic low back pain is 67%,[10, 15] suggesting that a substantial proportion of the risk of developing chronic spinal pain is driven by genetics. However, families also share similar lifestyles and express similar health behaviours and beliefs. This suggests shared environmental factors[8, 16] could also have an important influence on the prognosis of spinal pain.[17, 18]

Parental pain is strongly associated with the increased risk of chronic musculoskeletal pain in offspring, both during adolescence,[7] and in later adulthood.[19] Furthermore, there is preliminary evidence that treatment response in patients with chronic low back pain is influenced by genetic factors.[20] It is, therefore, possible that parental history of spinal pain influences the

1  
2  
3 prognosis of spinal pain in offspring. Conversely, several studies have shown that engagement in  
4 moderate to vigorous-intensity leisure time physical activity and maintenance of a normal body  
5 mass index (BMI) are associated with better prognosis of spinal pain.[21-25] Thus, a healthy  
6 offspring lifestyle could modify a possible adverse effect of parental spinal pain on prognosis of  
7 offspring spinal pain. Currently, there is limited knowledge about the influence of parental spinal  
8 pain on prognosis of spinal pain in offspring and whether this association is modified by  
9 offspring lifestyle.  
10  
11  
12  
13  
14  
15  
16  
17  
18  
19  
20

21 In this study, we have used population-based longitudinal data from the Norwegian HUNT Study  
22 to investigate the influence of parental spinal pain on the prognosis of chronic spinal pain  
23 regarding severity and activity limitation in the adult offspring. We have also investigated  
24 whether offspring leisure time physical activity and BMI modify any of these associations.  
25  
26  
27  
28  
29  
30  
31  
32

## 33 **METHODS**

### 34 **Study population**

35 The HUNT Study is a population-based health study conducted within the county of Nord-  
36 Trøndelag, Norway. The study was performed in three consecutive waves, first in 1984–1986  
37 (HUNT1), then in 1995–1997 (HUNT2), and last in 2006–2008 (HUNT3). In all three surveys,  
38 all residents 20 years of age and older were invited to participate, and information on lifestyle  
39 and health-related factors were collected by questionnaires and a clinical examination.  
40  
41  
42  
43  
44  
45  
46  
47  
48

49 Information on musculoskeletal pain was not collected at HUNT1. Therefore, those who were  
50 eligible for inclusion in this study had participated at HUNT2 and HUNT3. At HUNT2, 93,898  
51 individuals were invited to participate, and 65,237 (65.5%) joined the study, while at HUNT3  
52  
53  
54  
55  
56  
57  
58  
59  
60

1  
2  
3 93,860 were invited and 50,807 (54.1%) agreed to participate.[26, 27] Each participant signed  
4  
5 written consent, and the study was approved by the Regional Committee for Medical and Health  
6  
7 Research Ethics Central Norway (ref. no. 2011/1455). Further information about selection  
8  
9 procedures, participation and questionnaires used in the HUNT study can be found at  
10  
11 <http://www.ntnu.edu/hunt>.  
12  
13  
14  
15

### 16 **Patient involvement**

17  
18 Since historical cohort data was used in this study, patients were not involved in the conduct and  
19  
20 design of the study.  
21  
22  
23  
24  
25

### 26 **Record linkage**

27  
28 The unique 11-digit personal identification number held by all Norwegian citizens was used to  
29  
30 link each participant's record to information from the Family Registry at Statistics Norway, and  
31  
32 there by establish a link between parents and offspring who participated in one or both of  
33  
34 HUNT2 and HUNT3. The Family Registry provide data on persons registered as legal parents,  
35  
36 either as biological parents or through adoption. A total of 11,483 offspring reported spinal pain  
37  
38 at HUNT2, and of these, 6,662 could be followed-up on spinal pain status in HUNT3,  
39  
40 approximately 11 years later. To be able to study the association between parental spinal pain  
41  
42 and offspring prognosis of spinal pain, we selected all 1,529 parent-offspring trios (i.e., mother,  
43  
44 father and adult offspring) where both the mother and the father had information on spinal pain  
45  
46 from HUNT2.  
47  
48  
49  
50  
51  
52  
53  
54  
55  
56  
57  
58  
59  
60



### **Chronic spinal pain**

At HUNT2 and HUNT3, participants were asked to complete the Standardized Nordic Questionnaire which has acceptable reliability and validity.[28] The question regarding musculoskeletal pain was as follows: “In the last year, have you had pain and/or stiffness in muscles or joints that have lasted at least 3 consecutive months?” (response options: “no” and “yes”). Participants who answered “yes” were asked to indicate the affected body area(s). Offspring who reported chronic neck and/or low back pain (spinal pain) at HUNT2 were included in this study, and offspring who also reported spinal pain at HUNT3 were considered not recovered (outcome measure). Offspring reporting spinal pain at HUNT2 were also asked to indicate if the pain had led to reduced leisure time activity (response options: “no”, and “yes”) or reduced their work ability (response options: “no”, “to some extent”, “considerably”, or “don’t know”). Offspring who answered “yes” to the question on reduced leisure time activity and/or reported work ability to be reduced “to some extent” or “considerably”, were classified as having “activity limiting spinal pain”. In secondary analyses, we used this information to investigate the prognosis of activity limiting spinal pain; i.e., recovery was defined as not reporting activity limiting spinal pain at HUNT3. Based on the same question as described above, we obtained information on parental chronic spinal pain. Further, we created a variable with four mutually exclusive categories for presence of parental chronic spinal pain at baseline (exposure measure): “none”, “mother”, “father”, or “both parents”.

### **Leisure time physical activity**

Leisure time physical activity was assessed by the following question “How much of your leisure time have you been physically active during the last year? (Think of a weekly average for the

1  
2  
3 year. Your commute to work counts as leisure time)". Participants reported the number of hours  
4  
5 of either light (no sweating or heavy breathing) or hard (sweating and heavy breathing) activity  
6  
7 using the response options "none", "less than 1 hour", "1–2 hours", and "3 or more hours" for  
8  
9 each type of activity. Based on this information, we constructed a variable with four categories  
10  
11 (combining information on light and hard activity): 1) "inactive" (no light or hard activity), 2)  
12  
13 "low activity" (<3 hours light and no hard activity), 3) "moderate activity" ( $\geq 3$  hours light and/or  
14  
15 <1 hour hard activity), and 4) "high activity" (any light and  $\geq 1$  hour hard activity). In the  
16  
17 combined analyses of parental chronic spinal pain and offspring leisure time physical activity the  
18  
19 categories "inactive" and "low activity" were collapsed into one category labelled "Physically  
20  
21 inactive" and the categories "moderate activity" and "high activity" were collapsed into one  
22  
23 category labelled "Physically active". This categorization has been used previously in other  
24  
25 studies based in data from HUNT.[29, 30] We did not conduct analyses stratified by physical  
26  
27 activity status on the outcome "activity limiting spinal pain", since people with activity limiting  
28  
29 spinal pain are likely to have limited engagement in leisure and work activities.  
30  
31  
32  
33  
34  
35  
36  
37

### 38 **Body mass index**

39  
40 Standardized measurements of body height (to the nearest centimetre) and body weight (to the  
41  
42 nearest half kilogram) were obtained at clinical examination. BMI was calculated as weight  
43  
44 divided by the square of height ( $\text{kg}/\text{m}^2$ ), and classified into four BMI groups according to the  
45  
46 cut-off points suggested by the World Health Organization:[31] underweight ( $\text{BMI} < 18.5 \text{ kg}/\text{m}^2$ ),  
47  
48 normal weight ( $\text{BMI} 18.5\text{--}24.9 \text{ kg}/\text{m}^2$ ), overweight ( $\text{BMI} 25.0\text{--}29.9 \text{ kg}/\text{m}^2$ ), and obese ( $\text{BMI}$   
49  
50  $\geq 30.0 \text{ kg}/\text{m}^2$ ). Only 27 participants (1 %) were classified as "underweight", and the combined  
51  
52 analysis of parental chronic spinal pain and offspring BMI, the categories "underweight" and  
53  
54  
55  
56  
57  
58  
59  
60

1  
2  
3 “normal weight” were collapsed into one category labelled “normal weight”. The categories  
4  
5 “overweight” and “obese” were collapsed into one category labelled “overweight/obese”.  
6  
7  
8  
9

### 10 **Statistical analysis**

11  
12 We used a Poisson regression model[32-35] to estimate relative risk (RR) of chronic spinal pain  
13  
14 and activity limiting spinal pain in offspring whose parents reported chronic spinal pain, using  
15  
16 parents with no chronic spinal pain as the reference category. Precision of estimates was assessed  
17  
18 by a 95% confidence interval (CI). All standard errors were adjusted for within-family clustering  
19  
20 (i.e., siblings) using the vce (cluster) option in Stata, treating observations between families as  
21  
22 independent and within families as dependent, and thus avoiding inflated precision of the  
23  
24 estimated associations.[36]  
25  
26  
27  
28  
29

30  
31 Possible effect modification by offspring leisure time physical activity or offspring BMI was  
32  
33 assessed by stratified analyses (i.e. physically active vs physically inactive and normal weight vs  
34  
35 overweight/obese) as well as by tests of the estimated relative excess risk due to interaction  
36  
37 (RERI) (i.e., departure from additive effects). We calculated RERI estimates with 95% CIs from  
38  
39 the following equation:  $RERI = RR_{\text{parental pain \& physically active/overweight and/or obese}} - RR_{\text{noparental pain \&}}$   
40  
41  $RR_{\text{physically activity/ overweight and/or obese}} - RR_{\text{parental pain \& physically inactivity/normal weight}} + 1$  ,[37] i.e.,  $RERI > 0$   
42  
43 indicate a synergistic effect beyond an additive effect. Statistical interaction was also evaluated  
44  
45 on a multiplicative scale by a likelihood ratio test of a product term in the model (these  
46  
47 likelihood ratio tests had to be run without cluster-adjusted standard errors to avoid  
48  
49 misspecification of the model).  
50  
51  
52  
53  
54  
55  
56  
57  
58  
59  
60

1  
2  
3 The main analyses (parental influence on risk of poor prognosis) were adjusted for possible  
4 confounding by offspring sex (male, female), age (continuous), BMI (“underweight”, “normal  
5 weight”, “overweight”, “obese”, or “unknown”), leisure time physical activity (“physically  
6 inactive” or “physically active”, or “unknown”), education (“<10 years”, “10–12 years”, “>13  
7 years”, or “unknown”), and depression (“depressed”, or “not depressed”, or “unknown”).  
8  
9

10  
11  
12  
13  
14 Depression was assessed using the depression subscale of the Hospital Anxiety and Depression  
15 Scale (HADS) using a score of 8 as a cut-off for a dichotomised variable.[38-40]  
16  
17

18  
19  
20  
21 All statistical tests were two-sided, and all analyses were conducted using Stata statistical  
22 software (version 13.0, STATA Corp., College Station, TX, USA).  
23  
24  
25  
26  
27

## 28 **RESULTS**

29  
30  
31 In this prospective study of 1,529 offspring with chronic spinal pain at baseline, a total of 540  
32 (35%) offspring were defined as recovered after approximately 11 years of follow-up.  
33  
34

35 Additionally, among 775 offspring with activity limiting spinal pain, 244 were defined as  
36 recovered at follow-up. Descriptive statistics of offspring, mothers, and fathers are shown in  
37 Table 1. The mean age at baseline was 32.8 (8.6) years among offspring. Most offspring were  
38 physically active (63.9%), and nearly half of the offspring (42.3%) were classified as overweight  
39 or obese. About one third (33.1%) of the offspring were current smokers, and just a small portion  
40 of offspring (20.7%) reported having a higher education degree. A small proportion (10.4%) of  
41 offspring had symptoms of depression according to the Hospital Anxiety and Depression Scale.  
42  
43  
44  
45  
46  
47  
48  
49  
50  
51  
52  
53  
54  
55  
56  
57  
58  
59  
60

Table 1. Baseline characteristics of the study population at HUNT2

| Variables                                    | Offspring  | Mothers      | Fathers      |
|----------------------------------------------|------------|--------------|--------------|
| Participants, no.                            | 1,529      | 1,529        | 1,529        |
| Age, mean (SD)                               | 32.8 (8.6) | 63.8 (9.4)   | 67.2 (9.5)   |
| Body mass index, mean (SD)                   | 25.9 (5.2) | 28.3(7.3)    | 27.6 (6.9)   |
| Overweight/obese, % (n)                      | 42.3 (799) | 70.6 (1,080) | 72.2 (1,104) |
| Physically active <sup>a</sup> , % (n)       | 63.9 (977) | 43.0 (510)   | 57.7 (716)   |
| Current smoker, % (n)*                       | 33.1 (506) | 26.3 (400)   | 28.5 (434)   |
| Higher education <sup>b</sup> , % (n)        | 20.7 (316) | 4.5 (61)     | 6.0 (84)     |
| Symptoms of depression <sup>c</sup> , %, (n) | 10.4 (155) | 17.0 (225)   | 16.5 (215)   |

SD, standard deviation

<sup>a</sup> Engagement in moderate ( $\geq 3$  hours light and/or  $< 1$  hour hard activity per week) or high leisure time physical activity (any light and  $\geq 1$  hour hard activity per week)

<sup>b</sup> University education or higher

<sup>c</sup> Score  $\geq 8$  on the Hospital Anxiety and Depression Scale

### Chronic spinal pain and activity limiting spinal pain

Offspring with both parents reporting chronic spinal pain were less likely to recover from chronic spinal pain (RR: 0.83, 95% CI: 0.69, 0.99) and activity limiting spinal pain (RR: 0.71, 95% CI: 0.54-0.94) compared to offspring with no parents with chronic spinal pain (Table 2).

These associations were weaker and less precise when chronic spinal pain was present in only one parent, with similar associations observed for maternal and paternal spinal pain.

Table 2. Relative risk (RR) of recovery from spinal pain and activity limiting spinal pain in adult offspring associated with parental spinal pain.

| Parental spinal pain | Offspring spinal pain |              |          |                                      | Offspring activity limiting spinal pain |              |          |                                      |
|----------------------|-----------------------|--------------|----------|--------------------------------------|-----------------------------------------|--------------|----------|--------------------------------------|
|                      | No. of persons        | No. of cases | Crude RR | Adjusted RR <sup>a</sup><br>(95% CI) | No. of persons                          | No. of cases | Crude RR | Adjusted RR <sup>a</sup><br>(95% CI) |
| None                 | 346                   | 138          | 1.00     | 1.00 (Ref.)                          | 163                                     | 66           | 1.00     | 1.00 (Ref.)                          |
| Mother               | 424                   | 147          | 0.88     | 0.90<br>(0.75-1.07)                  | 214                                     | 62           | 0.73     | 0.74<br>(0.56-0.98)                  |
| Father               | 272                   | 97           | 0.90     | 0.91<br>(0.74-1.12)                  | 127                                     | 40           | 0.77     | 0.78<br>(0.57-1.05)                  |
| Both                 | 487                   | 158          | 0.82     | 0.83<br>(0.69-0.99)                  | 271                                     | 76           | 0.69     | 0.71<br>(0.54-0.94)                  |

CI, confidence interval

<sup>a</sup>Adjusted for age, sex, BMI, smoking, leisure time physical activity, education and HADS score.

### Physical activity

In the stratified analysis for physical activity, there was no strong evidence of effect modification for either physically active offspring (RR: 0.78; 95% CI: 0.62, 0.98), or physically inactive offspring (RR: 0.98; 95% CI: 0.71, 1.36) (Table 3). Tests of statistical interaction indicate no departure from neither multiplicative ( $p = 0.11$ ) nor additive effects (RERI 0.19, 95% CI, -0.17, 0.55), data not shown.

Table 3. Relative risk (RR) of recovery from spinal pain in adult offspring associated with parental spinal pain; analysis stratified by leisure time physical activity.

|                  | Physically active |              |                                   | Physical inactive |              |                                   |
|------------------|-------------------|--------------|-----------------------------------|-------------------|--------------|-----------------------------------|
|                  | No. of persons    | No. of cases | Adjusted RR <sup>a</sup> (95% CI) | No. of persons    | No. of cases | Adjusted RR <sup>a</sup> (95% CI) |
| None             | 229               | 97           | 1.00 (Ref.)                       | 111               | 40           | 1.00 (Ref.)                       |
| Mother or father | 434               | 163          | 0.94 (0.77-1.14)                  | 246               | 74           | 0.82 (0.60-1.11)                  |
| Both parents     | 314               | 100          | 0.78 (0.62-0.98)                  | 166               | 58           | 0.98 (0.71-1.35)                  |

CI: confidence interval

aAdjusted for age, sex, BMI, smoking, education and HADS score.

### Body mass index

In the stratified analysis for body mass index, there was no strong evidence of effect modification. However, offspring who were overweight or obese had the lowest probability of recovery if both parents report activity limiting spinal pain or chronic spinal pain (RR: 0.57; 95% CI: 0.39, 0.84 and RR: 0.79; 95% CI: 0.61, 1.03 respectively) compared to normal weight (Table 4). In addition, there was no clear evidence of statistical interaction neither on the additive (estimates of RERI for chronic spinal pain and activity limiting spinal pain were -0.04; 95% CI: -0.38, 0.30 and -0.34; 95% CI: -0.91, 0.23, respectively) nor on the multiplicative scale ( $p = 0.54$  and  $p = 0.20$ , respectively).

Table 4. Relative risk (RR) of recovery from spinal pain and activity limiting spinal pain in adult offspring associated with parental spinal pain; analysis stratified by BMI.

| Variables                               | Normal weight  |              |                                   | Overweight/obese |              |                                   |
|-----------------------------------------|----------------|--------------|-----------------------------------|------------------|--------------|-----------------------------------|
|                                         | No. of persons | No. of cases | Adjusted RR <sup>a</sup> (95% CI) | No. of persons   | No. of cases | Adjusted RR <sup>a</sup> (95% CI) |
| Offspring spinal pain                   |                |              |                                   |                  |              |                                   |
| Parental spinal pain                    |                |              |                                   |                  |              |                                   |
| None                                    | 168            | 68           | 1.00 (Ref.)                       | 177              | 69           | 1.00 (Ref.)                       |
| Mother or father                        | 316            | 111          | 0.88<br>(0.70-1.12)               | 380              | 133          | 0.89<br>(0.70-1.12)               |
| Both parents                            | 242            | 82           | 0.86<br>(0.66-1.11)               | 242              | 76           | 0.79<br>(0.61-1.03)               |
| Offspring activity limiting spinal pain |                |              |                                   |                  |              |                                   |
| Parental spinal pain                    |                |              |                                   |                  |              |                                   |
| None                                    | 86             | 34           | 1.00 (Ref.)                       | 130              | 50           | 1.00 (Ref.)                       |
| Mother or father                        | 151            | 42           | 0.72<br>(0.49-1.04)               | 301              | 98           | 0.72<br>(0.51-0.99)               |
| Both parents                            | 129            | 41           | 0.84<br>(0.57-1.24)               | 188              | 52           | 0.57<br>(0.39-0.84)               |

CI: confidence interval.

<sup>a</sup>Adjusted for age, sex, leisure physical activity, smoking, education and depression.



## DISCUSSION

### Summary of findings

The findings of this large population-based prospective family-linkage study indicate that offspring with both parents reporting chronic spinal pain are less likely to recover from chronic spinal pain and activity limiting spinal pain compared with offspring with no parent with spinal pain. Overall, there was no strong evidence that physical activity or body mass index modified these associations, although the results suggest that the inverse association between parental spinal pain and recovery from activity limiting spinal pain was strongest among offspring with a high BMI. This study supports the evidence from twin studies that genetics potentially influences recovery from chronic spinal pain,[41] but these intergenerational associations incorporate shared environmental factors and shared beliefs that could influence recovery. For instance, there is evidence showing that negative beliefs about pain and negative expectations about recovery predict chronic and disabling spinal pain.[42-44] It seems clear that it is important to consider the family history of chronic spinal pain as well as lifestyle behaviours when identifying people at higher risk of non-recovery.

### Comparison of findings with previous research

A recent systematic review showed that offspring of parents with chronic pain have poorer outcomes regarding pain, general health, psychological, and family functioning as compared to offspring of parents without pain.[45] The inter-generational transmission of spinal pain could be explained by genetic heritability[9, 10] or a family shared environment.[11-14] Moreover, it has

1  
2  
3 been suggested that the genetic influence is greater in more disabling pain conditions, such as  
4 chronic widespread pain and chronic activity limiting spinal pain, rather than in acute or sub-  
5 acute non-debilitating pain.[9, 10] It is widely accepted that lifestyle factors, such as physical  
6 activity and body weight, also play a significant role in the prognosis of chronic musculoskeletal  
7 pain.[46]  
8  
9  
10  
11  
12  
13  
14  
15  
16

17 Some studies have suggested that people with chronic back pain who regularly engage in leisure  
18 time physical activity have better prognosis measured in terms of pain, disability, and quality of  
19 life than those who are sedentary.[29, 47] However, there remains conflicting evidence regarding  
20 how physical activity influences the prognosis of spinal pain,[48] with studies demonstrating that  
21 both low and high levels of physical activity can negatively influence the prognosis of spinal  
22 pain.[49, 50] For instance, a study found that high leisure time physical activity was related to  
23 decreased prevalence of low back pain.[51] Whereas another study found that either high or low  
24 levels of leisure time physical activity was related to increased prevalence of low back pain.[49]  
25 In contrast, a prospective study did not find any significant association between moderate/high  
26 levels of leisure physical activity and low back pain in young adults.[52] Another follow-up  
27 study found that regular habits of leisure physical activity have no effect on recovery from low  
28 back pain.[53] The inconsistency in the literature is possibly attributed to the diverse definitions  
29 and classifications of levels of physical activity. If such divergent associations with leisure time  
30 physical activity exist this could mask a possible modifying effect of physical activity in our  
31 analyses.  
32  
33  
34  
35  
36  
37  
38  
39  
40  
41  
42  
43  
44  
45  
46  
47  
48  
49  
50  
51  
52  
53  
54  
55  
56  
57  
58  
59  
60

1  
2  
3 The literature has provided evidence that obesity is associated with poor outcomes in people with  
4 chronic widespread pain,[54, 55] as well as chronic spinal pain[29, 56, 57] and also decreases the  
5 probability of recovery from chronic spinal pain regardless of the care they receive,[25]  
6  
7  
8 however, whether BMI could modify[30] the relationship between parental spinal pain on  
9  
10 offspring recovery from chronic spinal pain has not been investigated before. Our results suggest  
11  
12 that offspring BMI may modify on the parent-offspring association of spinal pain, with  
13  
14 somewhat stronger associations among offspring who were classified as overweight or obese  
15  
16 than those who were underweight or normal weight. Research has shown that inter-individual  
17  
18 differences in pain sensitivity and endogenous pain-inhibitory capacity could reflect variations in  
19  
20 the inherent susceptibility for chronic pain,[58, 59] but that a triggering exposure is required for  
21  
22 the development of chronic pain.[60, 61] This could suggest that a possible genetic susceptibility  
23  
24 for poor recovery from chronic pain[62, 63] as a higher penetrance between offspring who are  
25  
26 overweight or obese.  
27  
28  
29  
30  
31  
32  
33  
34

### 35 **Strengths and limitations**

36  
37 This study has several strengths including the prospective design utilising a large population-  
38  
39 based sample with a long follow-up period. In addition, the registry based information on family  
40  
41 relations allowed us to include information on chronic spinal pain obtained from parents and  
42  
43 offspring independently and at different time points. An important aspect is that the offspring  
44  
45 were adults at the time of data collection, indicating that the parent-to-offspring association of  
46  
47 chronic spinal pain persists into adulthood when the offspring most likely live apart from their  
48  
49 parents. Furthermore, we were able to adjust for several offspring characteristics that could  
50  
51 confound the parent-offspring associations of chronic spinal pain, such as age,[64] BMI,[57]  
52  
53  
54  
55  
56  
57  
58  
59  
60

1  
2  
3 leisure physical activity,[65] smoking,[64] depression[64] and education.[10, 66] However, we  
4 cannot exclude the possible residual confounding attributable to unknown or unmeasured factors.  
5  
6  
7  
8  
9

10 There are some limitations that should be taken into account. First, information on chronic spinal  
11 pain was only reported at baseline and at follow-up 10-11 years later, with no information on  
12 possible changes in the status of chronic spinal pain during the follow-up period. Consequently, a  
13 person could have recovered from spinal pain at some time-point between the surveys, but still  
14 report pain at follow-up. However, if parental pain reflects an underlying heritable frailty, this  
15 may have an impact also on long-term recurrence and recovery from pain. Likewise, information  
16 on leisure time physical activity and BMI was only assessed at baseline, with no information on  
17 possible changes during the follow-up period. Second, although the questions about leisure time  
18 physical activity used in this study have been reported to have good reliability and provide useful  
19 measures of leisure physical activity,[67] subjective interpretations of the activity questions  
20 could have influenced the results. Besides, it is well known that self-reports may lead to under or  
21 overestimation of the variables of interest.[68] Third, a premise for inclusion into this study was  
22 that the mother, father and offspring all had to participate in the health survey. To some extent,  
23 this may have resulted in a selected and more health conscious sample than the general  
24 population. Nevertheless, it is questionable whether representativeness is a prerequisite for  
25 making valid risk assessments in epidemiological studies.[57] Fourth, although the Norwegian  
26 Family registry was used to identify family relations between parents and offspring,  
27 misclassification of biological family relations in the registry due to adoptions and non-paternity  
28 is possible. Although the influence on our results is likely to be small, such misclassification  
29 could give attenuated parent-offspring associations. Moreover, we had no information on  
30  
31  
32  
33  
34  
35  
36  
37  
38  
39  
40  
41  
42  
43  
44  
45  
46  
47  
48  
49  
50  
51  
52  
53  
54  
55  
56  
57  
58  
59  
60

1  
2  
3 whether the offspring shared environment with none, one or both of their biological parents  
4  
5 during childhood. Finally, residual confounding due to unmeasured or unknown factors cannot  
6  
7 be ruled out.  
8  
9

## 11 12 **CONCLUSION**

13  
14 Offspring with chronic spinal pain are less likely to recover if they have parents with chronic  
15  
16 spinal pain compared to offspring without parental chronic spinal pain. This association is  
17  
18 stronger when the offspring present pain that interferes with their usual work and leisure  
19  
20 activities (activity limiting spinal pain). The inverse association between parental chronic spinal  
21  
22 pain on recovery was somewhat stronger among offspring who were overweight or obese. The  
23  
24 association between parental chronic spinal pain and the prognosis of chronic spinal pain in the  
25  
26 adult offspring underlines the importance of identifying those at high risk of non-recovery since  
27  
28 they account for significant social and individual financial burden. Therefore, clinicians should  
29  
30 consider family history of spinal pain when implementing strategies to improve recovery from  
31  
32 chronic spinal pain, chronic spinal pain. For instance, the assessment of the potential risks of  
33  
34 physical activity and education about the range of benefits, as well as highlights the importance  
35  
36 of maintenance of a normal body weight.  
37  
38  
39  
40  
41  
42  
43  
44  
45  
46

## 47 **Acknowledgements**

48  
49 The HUNT Study is collaboration between the HUNT Research Centre (Faculty of Medicine,  
50  
51 Norwegian University of Science and Technology (NTNU), Nord-Trøndelag County Council,  
52  
53 Central Norway Regional Health Authority, and the Norwegian Institute of Public Health. ABA  
54  
55  
56  
57  
58  
59  
60

1  
2  
3 holds the International Post-graduate Research Scholarship “Science without Borders” award  
4  
5 from the Brazilian Government. PHF is funded by a NHMRC Research Fellowship and  
6  
7 University of Sydney SOAR Fellowship. MLF holds a MRFF/NHMRC Career Development  
8  
9 Fellowship and is a Sydney Medical Foundation Fellow.  
10  
11  
12  
13

14  
15 **Competing Interests:** None declared  
16  
17

18  
19 **Funding Statement:** This research was supported by a grant from the Department of Public  
20  
21 Health and Nursing, Norwegian University of Science and Technology, Trondheim, Norway.  
22  
23 However, this funding source had no role in the study’s design, data collection, analysis,  
24  
25 interpretation of the data, or the decision to submit the paper for publication.  
26  
27  
28  
29  
30

### 31 **Author Contributions**

32  
33 All authors critically revised the manuscript for important intellectual content and approved the  
34  
35 final manuscript. Please find below a detailed description of the role of each author:  
36  
37

- 38  
39 - Anita B Amorim: conception and design, analysis and interpretation of data, drafting and  
40  
41 revision of the manuscript, and final approval of the version to be published.  
42
- 43 - Paulo H Ferreira: conception and design, interpretation of data, drafting and revision of  
44  
45 the manuscript, and final approval of the version to be published.  
46  
47
- 48 - Manuela L Ferreira: conception and design, drafting and revision of the manuscript, and  
49  
50 final approval of the version to be published.  
51
- 52 - Ragnhild Lier: conception and design, drafting and revision of the manuscript, and final  
53  
54 approval of the version to be published.  
55  
56  
57

- 1  
2  
3 - Milena Simic: conception and design, drafting and revision of the manuscript, and final  
4 approval of the version to be published.  
5  
6
- 7  
8 - Evangelos Pappas: conception and design, drafting and revision of the manuscript, and  
9 final approval of the version to be published.  
10  
11
- 12 - Joshua R Zadro: conception and design, interpretation of data, drafting and revision of  
13 the manuscript, and final approval of the version to be published.  
14  
15
- 16 - Paul Jarle Mork: conception and design, acquisition and interpretation of data, drafting  
17 and revision of the manuscript and final approval of the version to be published.  
18  
19
- 20 - Tom Ivar Lund Nilsen: conception and design, acquisition and interpretation of data,  
21 drafting and revision of the manuscript and final approval of the version to be published.  
22  
23  
24  
25

26  
27  
28 **Data sharing statement:** No additional data available.  
29  
30  
31  
32  
33  
34  
35  
36  
37  
38  
39  
40  
41  
42  
43  
44  
45  
46

## 47 REFERENCES

48  
49  
50

- 51 1. Mortality, G.B.D. and C. Causes of Death, *Global, regional, and national life*  
52 *expectancy, all-cause mortality, and cause-specific mortality for 249 causes of death,*  
53  
54  
55  
56  
57  
58  
59  
60

- 1  
2  
3 *1980-2015: a systematic analysis for the Global Burden of Disease Study 2015*. Lancet,  
4  
5 2016. **388**(10053): p. 1459-1544.
- 6  
7  
8 2. Vasseljen, O., et al., *Natural course of acute neck and low back pain in the general*  
9  
10 *population: the HUNT study*. Pain, 2013. **154**(8): p. 1237-44.
- 11  
12  
13 3. Croft, P.R., et al., *Outcome of low back pain in general practice: a prospective study*.  
14  
15 BMJ, 1998. **316**(7141): p. 1356-9.
- 16  
17  
18 4. Itz, C.J., et al., *Clinical course of non-specific low back pain: a systematic review of*  
19  
20 *prospective cohort studies set in primary care*. Eur J Pain, 2013. **17**(1): p. 5-15.
- 21  
22  
23 5. Kent, P.M. and J.L. Keating, *Can we predict poor recovery from recent-onset nonspecific*  
24  
25 *low back pain? A systematic review*. Man Ther, 2008. **13**(1): p. 12-28.
- 26  
27  
28 6. Gore, M., et al., *The burden of chronic low back pain: clinical comorbidities, treatment*  
29  
30 *patterns, and health care costs in usual care settings*. Spine (Phila Pa 1976), 2012.  
31  
32 **37**(11): p. E668-77.
- 33  
34  
35 7. Hoftun, G.B., P.R. Romundstad, and M. Rygg, *Association of parental chronic pain with*  
36  
37 *chronic pain in the adolescent and young adult: family linkage data from the HUNT*  
38  
39 *Study*. JAMA Pediatr, 2013. **167**(1): p. 61-9.
- 40  
41  
42 8. Saunders, K., et al., *Relationship of common pain conditions in mothers and children*.  
43  
44 Clin J Pain, 2007. **23**(3): p. 204-13.
- 45  
46  
47 9. Kato, K., et al., *Importance of genetic influences on chronic widespread pain*. Arthritis  
48  
49 Rheum, 2006. **54**(5): p. 1682-6.
- 50  
51  
52 10. Hocking, L.J., et al., *Heritability of chronic pain in 2195 extended families*. Eur J Pain,  
53  
54 2012. **16**(7): p. 1053-63.



- 1  
2  
3 11. Violon, A. and D. Giurgea, *Familial models for chronic pain*. Pain, 1984. **18**(2): p. 199-  
4 203.  
5  
6
- 7  
8 12. Pollard, C.A., *Family history and severity of disability associated with chronic low back*  
9 *pain*. Psychol Rep, 1985. **57**(3 Pt 1): p. 813-4.  
10  
11
- 12 13. Payne, B. and M.A. Norfleet, *Chronic pain and the family: a review*. Pain, 1986. **26**(1): p.  
13 1-22.  
14  
15
- 16 14. Bruehl, S., et al., *How accurate are parental chronic pain histories provided by*  
17 *offspring?* Pain, 2005. **115**(3): p. 390-7.  
18  
19
- 20 15. Ferreira, P.H., et al., *Nature or nurture in low back pain? Results of a systematic review*  
21 *of studies based on twin samples*. Eur J Pain, 2013. **17**(7): p. 957-71.  
22  
23
- 24 16. Levy, R.L. and S.L. Langer, *Pain, disability, and symptoms among siblings of children*  
25 *with functional abdominal pain*. J Dev Behav Pediatr, 2007. **28**(1): p. 45-6.  
26  
27
- 28 17. Cardol, M., et al., *All in the family: headaches and abdominal pain as indicators for*  
29 *consultation patterns in families*. Ann Fam Med, 2006. **4**(6): p. 506-11.  
30  
31
- 32 18. Cardol, M., et al., *Striking variations in consultation rates with general practice reveal*  
33 *family influence*. BMC Fam Pract, 2007. **8**: p. 4.  
34  
35
- 36 19. Lier, R., T.I. Nilsen, and P.J. Mork, *Parental chronic pain in relation to chronic pain in*  
37 *their adult offspring: family-linkage within the HUNT Study, Norway*. BMC Public  
38 Health, 2014. **14**: p. 797.  
39  
40
- 41 20. Luchting, B., et al., *Expression of miRNA-124a in CD4 Cells Reflects Response to a*  
42 *Multidisciplinary Treatment Program in Patients With Chronic Low Back Pain*. Spine  
43 (Phila Pa 1976), 2017. **42**(4): p. E226-E233.  
44  
45  
46  
47  
48  
49  
50  
51  
52  
53  
54  
55  
56  
57  
58  
59  
60

- 1  
2  
3 21. Blangsted, A.K., et al., *One-year randomized controlled trial with different physical-*  
4 *activity programs to reduce musculoskeletal symptoms in the neck and shoulders among*  
5 *office workers.* Scand J Work Environ Health, 2008. **34**(1): p. 55-65.  
6  
7  
8  
9  
10 22. Linton, S.J. and M.W. van Tulder, *Preventive interventions for back and neck pain*  
11 *problems: what is the evidence?* Spine (Phila Pa 1976), 2001. **26**(7): p. 778-87.  
12  
13  
14 23. van den Heuvel, S.G., et al., *The effect of physical activity in leisure time on neck and*  
15 *upper limb symptoms.* Prev Med, 2005. **41**(1): p. 260-7.  
16  
17  
18  
19 24. Krismer, M., et al., *Strategies for prevention and management of musculoskeletal*  
20 *conditions. Low back pain (non-specific).* Best Pract Res Clin Rheumatol, 2007. **21**(1): p.  
21  
22  
23  
24  
25  
26 25. Ewald, S.C., E.L. Hurwitz, and A. Kizhakkeveetil, *The effect of obesity on treatment*  
27 *outcomes for low back pain.* Chiropr Man Therap, 2016. **24**: p. 48.  
28  
29  
30  
31 26. Krokstad, S., et al., *Cohort Profile: the HUNT Study, Norway.* Int J Epidemiol, 2013.  
32  
33  
34  
35  
36 27. Langhammer, A., et al., *The HUNT study: participation is associated with survival and*  
37 *depends on socioeconomic status, diseases and symptoms.* BMC Med Res Methodol,  
38  
39  
40  
41  
42  
43 28. Kuorinka, I., et al., *Standardised Nordic questionnaires for the analysis of*  
44 *musculoskeletal symptoms.* Appl Ergon, 1987. **18**(3): p. 233-7.  
45  
46  
47 29. Nilsen, T.I., A. Holtermann, and P.J. Mork, *Physical exercise, body mass index, and risk*  
48 *of chronic pain in the low back and neck/shoulders: longitudinal data from the Nord-*  
49 *Trondelag Health Study.* Am J Epidemiol, 2011. **174**(3): p. 267-73.  
50  
51  
52  
53  
54  
55  
56  
57  
58  
59  
60

- 1  
2  
3 30. Lier, R., et al., *Familial Risk of Chronic Musculoskeletal Pain and the Importance of*  
4 *Physical Activity and Body Mass Index: Prospective Data from the HUNT Study,*  
5 *Norway.* PLoS One, 2016. **11**(4): p. e0153828.  
6  
7  
8  
9  
10 31. *Physical status: The Use and Interpretation of Anthropometry. Report of a WHO Expert*  
11 *Committee.*  
12  
13  
14  
15 (*WHO Technical Report Series no. 854*). , W.T.R.S.n. 854). Editor. 1995: Geneva: World Health  
16 Organization.  
17  
18  
19  
20 32. Altman, D.G., et al., *Prognosis and prognostic research: validating a prognostic model.*  
21 *BMJ*, 2009. **338**: p. b605.  
22  
23  
24 33. Moons, K.G., et al., *Prognosis and prognostic research: application and impact of*  
25 *prognostic models in clinical practice.* *BMJ*, 2009. **338**: p. b606.  
26  
27  
28  
29 34. Moons, K.G., et al., *Prognosis and prognostic research: what, why, and how?* *BMJ*,  
30 2009. **338**: p. b375.  
31  
32  
33  
34 35. Royston, P., et al., *Prognosis and prognostic research: Developing a prognostic model.*  
35 *BMJ*, 2009. **338**: p. b604.  
36  
37  
38 36. Martin, R.M., et al., *Parents' growth in childhood and the birth weight of their offspring.*  
39 *Epidemiology*, 2004. **15**(3): p. 308-16.  
40  
41  
42  
43 37. Andersson, T., et al., *Calculating measures of biological interaction.* *Eur J Epidemiol*,  
44 2005. **20**(7): p. 575-9.  
45  
46  
47 38. Snaith, R.P., *The Hospital Anxiety And Depression Scale.* Health Qual Life Outcomes,  
48 2003. **1**: p. 29.  
49  
50  
51  
52 39. Bjelland, I., et al., *The validity of the Hospital Anxiety and Depression Scale. An updated*  
53 *literature review.* *J Psychosom Res*, 2002. **52**(2): p. 69-77.  
54  
55  
56  
57  
58  
59  
60

- 1  
2  
3 40. Zigmond, A.S. and R.P. Snaith, *The hospital anxiety and depression scale*. Acta  
4  
5 Psychiatr Scand, 1983. **67**(6): p. 361-70.  
6  
7  
8 41. Zadro, J.R., et al., *Does Familial Aggregation of Chronic Low Back Pain Affect*  
9  
10 *Recovery?: A Population-Based Twin Study*. Spine (Phila Pa 1976), 2017. **42**(17): p.  
11  
12 1295-1301.  
13  
14 42. Urquhart, D.M., et al., *Negative beliefs about low back pain are associated with high*  
15  
16 *pain intensity and high level disability in community-based women*. BMC Musculoskelet  
17  
18 *Disord*, 2008. **9**: p. 148.  
19  
20  
21 43. Wertli, M.M., et al., *Catastrophizing-a prognostic factor for outcome in patients with low*  
22  
23 *back pain: a systematic review*. Spine J, 2014. **14**(11): p. 2639-57.  
24  
25  
26 44. Fujii, T., K. Matsudaira, and H. Oka, *Factors associated with fear-avoidance beliefs*  
27  
28 *about low back pain*. J Orthop Sci, 2013. **18**(6): p. 909-15.  
29  
30  
31 45. Higgins, K.S., et al., *Offspring of parents with chronic pain: a systematic review and*  
32  
33 *meta-analysis of pain, health, psychological, and family outcomes*. Pain, 2015. **156**(11):  
34  
35 p. 2256-66.  
36  
37  
38 46. Dean, E. and A. Soderlund, *What is the role of lifestyle behaviour change associated with*  
39  
40 *non-communicable disease risk in managing musculoskeletal health conditions with*  
41  
42 *special reference to chronic pain?* BMC Musculoskelet Disord, 2015. **16**: p. 87.  
43  
44  
45 47. Pinto, R.Z., et al., *Self-reported moderate-to-vigorous leisure time physical activity*  
46  
47 *predicts less pain and disability over 12 months in chronic and persistent low back pain*.  
48  
49 *Eur J Pain*, 2014. **18**(8): p. 1190-8.  
50  
51  
52 48. Sitthipornvorakul, E., et al., *The association between physical activity and neck and low*  
53  
54 *back pain: a systematic review*. Eur Spine J, 2011. **20**(5): p. 677-89.  
55  
56  
57  
58  
59  
60

- 1  
2  
3 49. Heneweer, H., L. Vanhees, and H.S. Picavet, *Physical activity and low back pain: a U-*  
4 *shaped relation?* Pain, 2009. **143**(1-2): p. 21-5.  
5  
6  
7  
8 50. Heneweer, H., et al., *Physical activity and low back pain: a systematic review of recent*  
9 *literature.* Eur Spine J, 2011. **20**(6): p. 826-45.  
10  
11  
12 51. Hartvigsen, J. and K. Christensen, *Active lifestyle protects against incident low back pain*  
13 *in seniors: a population-based 2-year prospective study of 1387 Danish twins aged 70-*  
14 *100 years.* Spine (Phila Pa 1976), 2007. **32**(1): p. 76-81.  
15  
16  
17  
18  
19 52. Lunde, L.K., et al., *Low back pain and physical activity--A 6.5 year follow-up among*  
20 *young adults in their transition from school to working life.* BMC Public Health, 2015.  
21  
22 **15**: p. 1115.  
23  
24  
25  
26 53. Mortimer, M., G. Pernold, and C. Wiktorin, *Low back pain in a general population.*  
27 *Natural course and influence of physical exercise--a 5-year follow-up of the*  
28 *Musculoskeletal Intervention Center-Norrtalje Study.* Spine (Phila Pa 1976), 2006.  
29  
30 **31**(26): p. 3045-51.  
31  
32  
33  
34  
35 54. Magnusson, K., K.B. Hagen, and B. Natvig, *Individual and joint effects of risk factors for*  
36 *onset widespread pain and obesity - a population-based prospective cohort study.* Eur J  
37 *Pain*, 2016. **20**(7): p. 1102-10.  
38  
39  
40  
41  
42 55. Mundal, I., et al., *Prevalence and long-term predictors of persistent chronic widespread*  
43 *pain in the general population in an 11-year prospective study: the HUNT study.* BMC  
44 *Musculoskelet Disord*, 2014. **15**: p. 213.  
45  
46  
47  
48  
49 56. Mork, P.J., et al., *Sleep problems, exercise and obesity and risk of chronic*  
50 *musculoskeletal pain: the Norwegian HUNT study.* Eur J Public Health, 2014. **24**(6): p.  
51 **924-9.**  
52  
53  
54  
55  
56  
57  
58  
59  
60

- 1  
2  
3 57. Ray, L., et al., *Mechanisms of association between obesity and chronic pain in the*  
4 *elderly*. Pain, 2011. **152**(1): p. 53-9.  
5  
6  
7 58. Edwards, R.R., *Individual differences in endogenous pain modulation as a risk factor for*  
8 *chronic pain*. Neurology, 2005. **65**(3): p. 437-43.  
9  
10  
11 59. Bradley, L.A., *Pathophysiologic mechanisms of fibromyalgia and its related disorders*. J  
12 Clin Psychiatry, 2008. **69 Suppl 2**: p. 6-13.  
13  
14  
15 60. Buskila, D. and L. Neumann, *Genetics of fibromyalgia*. Curr Pain Headache Rep, 2005.  
16 **9**(5): p. 313-5.  
17  
18  
19 61. Mogil, J.S., *Pain genetics: past, present and future*. Trends Genet, 2012. **28**(6): p. 258-  
20 66.  
21  
22  
23 62. Pollard, T.C., et al., *Genetic predisposition to the presence and 5-year clinical*  
24 *progression of hip osteoarthritis*. Osteoarthritis Cartilage, 2012. **20**(5): p. 368-75.  
25  
26  
27 63. Holliday, K.L. and J. McBeth, *Recent advances in the understanding of genetic*  
28 *susceptibility to chronic pain and somatic symptoms*. Curr Rheumatol Rep, 2011. **13**(6):  
29 p. 521-7.  
30  
31  
32 64. Cimmino, M.A., C. Ferrone, and M. Cutolo, *Epidemiology of chronic musculoskeletal*  
33 *pain*. Best Pract Res Clin Rheumatol, 2011. **25**(2): p. 173-83.  
34  
35  
36 65. Holth, H.S., et al., *Physical inactivity is associated with chronic musculoskeletal*  
37 *complaints 11 years later: results from the Nord-Trondelag Health Study*. BMC  
38 Musculoskelet Disord, 2008. **9**: p. 159.  
39  
40  
41 66. Hagen, K., et al., *Low socioeconomic status is associated with chronic musculoskeletal*  
42 *complaints among 46,901 adults in Norway*. Scand J Public Health, 2005. **33**(4): p. 268-  
43 75.  
44  
45  
46  
47  
48  
49  
50  
51  
52  
53  
54  
55  
56  
57  
58  
59  
60

- 1  
2  
3 67. Kurtze, N., et al., *Reliability and validity of self-reported physical activity in the Nord-*  
4 *Trondelag Health Study (HUNT 2)*. Eur J Epidemiol, 2007. **22**(6): p. 379-87.  
5  
6  
7  
8 68. Ainsworth, B., et al., *The current state of physical activity assessment tools*. Prog  
9  
10 Cardiovasc Dis, 2015. **57**(4): p. 387-95.  
11  
12  
13  
14  
15  
16  
17  
18  
19  
20  
21  
22  
23  
24  
25  
26  
27  
28  
29  
30  
31  
32  
33  
34  
35  
36  
37  
38  
39  
40  
41  
42  
43  
44  
45  
46  
47  
48  
49  
50  
51  
52  
53  
54  
55  
56  
57  
58  
59  
60

For peer review only

# Reporting checklist for cohort study.

Based on the STROBE cohort guidelines.

## Instructions to authors

Complete this checklist by entering the page numbers from your manuscript where readers will find each of the items listed below.

Your article may not currently address all the items on the checklist. Please modify your text to include the missing information. If you are certain that an item does not apply, please write "n/a" and provide a short explanation.

Upload your completed checklist as an extra file when you submit to a journal.

In your methods section, say that you used the STROBE cohort reporting guidelines, and cite them as:

von Elm E, Altman DG, Egger M, Pocock SJ, Gøtzsche PC, Vandenbroucke JP. The Strengthening the Reporting of Observational Studies in Epidemiology (STROBE) Statement: guidelines for reporting observational studies.

|                        |     | Reporting Item                                                                                                                  | Page Number |
|------------------------|-----|---------------------------------------------------------------------------------------------------------------------------------|-------------|
| Title                  | #1a | Indicate the study's design with a commonly used term in the title or the abstract                                              | 1           |
| Abstract               | #1b | Provide in the abstract an informative and balanced summary of what was done and what was found                                 | 2           |
| Background / rationale | #2  | Explain the scientific background and rationale for the investigation being reported                                            | 4           |
| Objectives             | #3  | State specific objectives, including any prespecified hypotheses                                                                | 5           |
| Study design           | #4  | Present key elements of study design early in the paper                                                                         | 5           |
| Setting                | #5  | Describe the setting, locations, and relevant dates, including periods of recruitment, exposure, follow-up, and data collection | 5           |
| Eligibility criteria   | #6a | Give the eligibility criteria, and the sources and methods of selection of participants. Describe methods of follow-up.         | 5           |



|    |                  |      |                                                                   |          |
|----|------------------|------|-------------------------------------------------------------------|----------|
| 1  |                  | #6b  | For matched studies, give matching criteria and number of         | 6        |
| 2  |                  |      | exposed and unexposed                                             |          |
| 3  |                  |      |                                                                   |          |
| 4  |                  |      |                                                                   |          |
| 5  | Variables        | #7   | Clearly define all outcomes, exposures, predictors, potential     | 6, 7 and |
| 6  |                  |      | confounders, and effect modifiers. Give diagnostic criteria, if   | 8        |
| 7  |                  |      | applicable                                                        |          |
| 8  |                  |      |                                                                   |          |
| 9  |                  |      |                                                                   |          |
| 10 | Data sources /   | #8   | For each variable of interest give sources of data and details of | See note |
| 11 | measurement      |      | methods of assessment (measurement). Describe                     | 1        |
| 12 |                  |      | comparability of assessment methods if there is more than one     |          |
| 13 |                  |      | group. Give information separately for for exposed and            |          |
| 14 |                  |      | unexposed groups if applicable.                                   |          |
| 15 |                  |      |                                                                   |          |
| 16 |                  |      |                                                                   |          |
| 17 |                  |      |                                                                   |          |
| 18 | Bias             | #9   | Describe any efforts to address potential sources of bias         | 8        |
| 19 |                  |      |                                                                   |          |
| 20 |                  |      |                                                                   |          |
| 21 | Study size       | #10  | Explain how the study size was arrived at                         | 6        |
| 22 |                  |      |                                                                   |          |
| 23 | Quantitative     | #11  | Explain how quantitative variables were handled in the            | 8        |
| 24 | variables        |      | analyses. If applicable, describe which groupings were chosen,    |          |
| 25 |                  |      | and why                                                           |          |
| 26 |                  |      |                                                                   |          |
| 27 |                  |      |                                                                   |          |
| 28 | Statistical      | #12a | Describe all statistical methods, including those used to control | 8 and 9  |
| 29 | methods          |      | for confounding                                                   |          |
| 30 |                  |      |                                                                   |          |
| 31 |                  |      |                                                                   |          |
| 32 |                  | #12b | Describe any methods used to examine subgroups and                | 8 and 9  |
| 33 |                  |      | interactions                                                      |          |
| 34 |                  |      |                                                                   |          |
| 35 |                  |      |                                                                   |          |
| 36 |                  | #12c | Explain how missing data were addressed                           | 8 and 9  |
| 37 |                  |      |                                                                   |          |
| 38 |                  | #12d | If applicable, explain how loss to follow-up was addressed        | 8 and 9  |
| 39 |                  |      |                                                                   |          |
| 40 |                  |      |                                                                   |          |
| 41 |                  | #12e | Describe any sensitivity analyses                                 | 8 and 9  |
| 42 |                  |      |                                                                   |          |
| 43 | Participants     | #13a | Report numbers of individuals at each stage of study—eg           | 9 and 10 |
| 44 |                  |      | numbers potentially eligible, examined for eligibility, confirmed |          |
| 45 |                  |      | eligible, included in the study, completing follow-up, and        |          |
| 46 |                  |      | analysed. Give information separately for for exposed and         |          |
| 47 |                  |      | unexposed groups if applicable.                                   |          |
| 48 |                  |      |                                                                   |          |
| 49 |                  |      |                                                                   |          |
| 50 |                  |      |                                                                   |          |
| 51 |                  | #13b | Give reasons for non-participation at each stage                  | 9 and 10 |
| 52 |                  |      |                                                                   |          |
| 53 |                  |      |                                                                   |          |
| 54 |                  | #13c | Consider use of a flow diagram                                    | n/a      |
| 55 |                  |      |                                                                   |          |
| 56 | Descriptive data | #14a | Give characteristics of study participants (eg demographic,       | 9 and 10 |
| 57 |                  |      | clinical, social) and information on exposures and potential      |          |
| 58 |                  |      |                                                                   |          |
| 59 |                  |      |                                                                   |          |
| 60 |                  |      |                                                                   |          |

|    |                  |                                                                        |          |
|----|------------------|------------------------------------------------------------------------|----------|
| 1  |                  | confounders. Give information separately for exposed and               |          |
| 2  |                  | unexposed groups if applicable.                                        |          |
| 3  |                  |                                                                        |          |
| 4  |                  | #14b Indicate number of participants with missing data for each        | n/a      |
| 5  |                  | variable of interest                                                   |          |
| 6  |                  |                                                                        |          |
| 7  |                  |                                                                        |          |
| 8  |                  | #14c Summarise follow-up time (eg, average and total amount)           | 9 and 10 |
| 9  |                  |                                                                        |          |
| 10 | Outcome data     | #15 Report numbers of outcome events or summary measures               | 10 and   |
| 11 |                  | over time. Give information separately for exposed and                 | 11       |
| 12 |                  | unexposed groups if applicable.                                        |          |
| 13 |                  |                                                                        |          |
| 14 |                  |                                                                        |          |
| 15 | Main results     | #16a Give unadjusted estimates and, if applicable, confounder-         | 10 and   |
| 16 |                  | adjusted estimates and their precision (eg, 95% confidence             | 11       |
| 17 |                  | interval). Make clear which confounders were adjusted for and          |          |
| 18 |                  | why they were included                                                 |          |
| 19 |                  |                                                                        |          |
| 20 |                  |                                                                        |          |
| 21 |                  |                                                                        |          |
| 22 |                  | #16b Report category boundaries when continuous variables were         | 10 and   |
| 23 |                  | categorized                                                            | 11       |
| 24 |                  |                                                                        |          |
| 25 |                  |                                                                        |          |
| 26 |                  | #16c If relevant, consider translating estimates of relative risk into | n/a      |
| 27 |                  | absolute risk for a meaningful time period                             |          |
| 28 |                  |                                                                        |          |
| 29 |                  |                                                                        |          |
| 30 | Other analyses   | #17 Report other analyses done—e.g., analyses of subgroups and         | 10 and   |
| 31 |                  | interactions, and sensitivity analyses                                 | 11       |
| 32 |                  |                                                                        |          |
| 33 |                  |                                                                        |          |
| 34 | Key results      | #18 Summarise key results with reference to study objectives           | 11 and   |
| 35 |                  |                                                                        | 12       |
| 36 |                  |                                                                        |          |
| 37 |                  |                                                                        |          |
| 38 | Limitations      | #19 Discuss limitations of the study, taking into account sources of   | 13       |
| 39 |                  | potential bias or imprecision. Discuss both direction and              |          |
| 40 |                  | magnitude of any potential bias.                                       |          |
| 41 |                  |                                                                        |          |
| 42 |                  |                                                                        |          |
| 43 | Interpretation   | #20 Give a cautious overall interpretation considering objectives,     | 13 and   |
| 44 |                  | limitations, multiplicity of analyses, results from similar studies,   | 14       |
| 45 |                  | and other relevant evidence.                                           |          |
| 46 |                  |                                                                        |          |
| 47 |                  |                                                                        |          |
| 48 | Generalisability | #21 Discuss the generalisability (external validity) of the study      | 13 and   |
| 49 |                  | results                                                                | 14       |
| 50 |                  |                                                                        |          |
| 51 |                  |                                                                        |          |
| 52 | Funding          | #22 Give the source of funding and the role of the funders for the     | 15 and   |
| 53 |                  | present study and, if applicable, for the original study on which      | 16       |
| 54 |                  | the present article is based                                           |          |
| 55 |                  |                                                                        |          |
| 56 |                  |                                                                        |          |
| 57 |                  |                                                                        |          |

## Author notes

1. 6, 7 and 8

The STROBE checklist is distributed under the terms of the Creative Commons Attribution License CC-BY. This checklist was completed on 02. March 2018 using <http://www.goodreports.org/>, a tool made by the [EQUATOR Network](#) in collaboration with [Penelope.ai](#)

For peer review only

# BMJ Open

## The influence of family history on prognosis of spinal pain and the role of leisure time physical activity and body mass index: a prospective study using family-linkage data from the Norwegian HUNT Study.

|                                 |                                                                                                                                                                                                                                                                                                                                                                                                                                                                                                                                                                                                                                                                                                                                                                                                                                                      |
|---------------------------------|------------------------------------------------------------------------------------------------------------------------------------------------------------------------------------------------------------------------------------------------------------------------------------------------------------------------------------------------------------------------------------------------------------------------------------------------------------------------------------------------------------------------------------------------------------------------------------------------------------------------------------------------------------------------------------------------------------------------------------------------------------------------------------------------------------------------------------------------------|
| Journal:                        | <i>BMJ Open</i>                                                                                                                                                                                                                                                                                                                                                                                                                                                                                                                                                                                                                                                                                                                                                                                                                                      |
| Manuscript ID                   | bmjopen-2018-022785.R2                                                                                                                                                                                                                                                                                                                                                                                                                                                                                                                                                                                                                                                                                                                                                                                                                               |
| Article Type:                   | Research                                                                                                                                                                                                                                                                                                                                                                                                                                                                                                                                                                                                                                                                                                                                                                                                                                             |
| Date Submitted by the Author:   | 28-Aug-2018                                                                                                                                                                                                                                                                                                                                                                                                                                                                                                                                                                                                                                                                                                                                                                                                                                          |
| Complete List of Authors:       | Amorim, Anita; The University of Sydney, Faculty of Health Sciences<br>Ferreira, Paulo; University of Sydney, Faculty of Health Science<br>Ferreira, Manuela; University of Sydney Institute of Bone and Joint Research,<br>Lier, Ragnhild; NTNU Det Medisinske Fakultet DMF, Department of Public Health and General Practice<br>Simic, Milena; The University of Sydney, Physiotherapy<br>Pappas, Evangelos; University of Sydney, Discipline of Physiotherapy, Faculty of Health Sciences; University of Sydney<br>Zadro, Joshua; University of Sydney, Faculty of Health Science<br>Mork, Paul Jarle; Norges teknisk-naturvitenskapelige universitet, Department of Public Health and Nursing; Norwegian University of Science and Technology<br>Nilsen, Tom; NTNU Det Medisinske Fakultet DMF, Department of Public Health and General Practice |
| <b>Primary Subject Heading</b>: | Epidemiology                                                                                                                                                                                                                                                                                                                                                                                                                                                                                                                                                                                                                                                                                                                                                                                                                                         |
| Secondary Subject Heading:      | Genetics and genomics, Epidemiology, Public health                                                                                                                                                                                                                                                                                                                                                                                                                                                                                                                                                                                                                                                                                                                                                                                                   |
| Keywords:                       | Low back pain, neck pain, chronic pain, obesity, family study, physical activity                                                                                                                                                                                                                                                                                                                                                                                                                                                                                                                                                                                                                                                                                                                                                                     |
|                                 |                                                                                                                                                                                                                                                                                                                                                                                                                                                                                                                                                                                                                                                                                                                                                                                                                                                      |

SCHOLARONE™  
Manuscripts

1  
2  
3 **The influence of family history on prognosis of spinal pain and the role of leisure time**  
4 **physical activity and body mass index: a prospective study using family-linkage data from**  
5 **the Norwegian HUNT Study.**  
6  
7  
8  
9

10  
11  
12 Anita B. Amorim<sup>1</sup>; Paulo H. Ferreira<sup>1</sup>; Manuela L. Ferreira<sup>2</sup>; Ragnhild Lier<sup>3</sup>; Milena Simic<sup>1</sup>;  
13  
14 Evangelos Pappas<sup>1</sup>; Joshua R. Zadro<sup>1</sup>; Paul Jarle Mork<sup>3</sup>; Tom Ivar Lund Nilsen<sup>3,4\*</sup>  
15  
16  
17  
18

19 <sup>1</sup> The University of Sydney, Discipline of Physiotherapy, Faculty of Health Sciences, Sydney,  
20  
21 NSW, Australia.  
22

23 <sup>2</sup> Institute of Bone and Joint Research, The Kolling Institute, Sydney Medical School, Sydney,  
24  
25 Australia  
26  
27

28 <sup>3</sup> Department of Public Health and Nursing, Norwegian University of Science and Technology,  
29  
30 Trondheim, Norway  
31  
32

33 <sup>4</sup> Clinic of Anaesthesia and Intensive Care, St Olavs Hospital, Trondheim University Hospital,  
34  
35 Trondheim, Norway  
36  
37

38  
39  
40 \*Corresponding author: Tom Ivar Lund Nilsen – NTNU Det Medisinske Fakultet DMF,  
41  
42 Department of Public Health and General Practice, Norwegian University of Science and  
43  
44 Technology, Trondheim, Norway  
45

46  
47 Telephone: +47 73598224/ email: tom.nilsen@ntnu.no  
48  
49

50  
51 Word count: 3,841  
52  
53  
54  
55  
56  
57  
58  
59  
60

## ABSTRACT

**Objectives:** To investigate the influence of parental chronic spinal pain on prognosis of chronic spinal pain in adult offspring, and whether offspring physical activity level and body mass index (BMI) modified this association.

**Design:** Prospective cohort study.

**Setting:** We used family linked longitudinal data from the Norwegian HUNT study collected in HUNT2 (1995-97) and HUNT3 (2006-08).

**Participants:** A total of 1,529 offspring who reported spinal pain in HUNT2 were linked with parental data and followed-up in HUNT3.

**Outcomes:** We estimated relative risk (RR) with 95% confidence intervals (CIs) for recovery from chronic spinal pain, and also from activity limiting spinal pain, in offspring related to chronic spinal pain in parents. We also investigated whether offspring leisure time physical activity and BMI modified these intergenerational associations in spinal pain.

**Results:** A total of 540 (35%) offspring were defined as recovered after approximately 11 years of follow-up. Offspring with both parents reporting chronic spinal pain were less likely to recover from chronic spinal pain (RR: 0.83, 95% CI: 0.69, 0.99) and activity limiting spinal pain (RR: 0.71, 95% CI: 0.54, 0.94), compared to offspring of parents without chronic spinal pain.

Analyses stratified by BMI and physical activity showed no strong evidence of effect modification on these associations. However, offspring who were overweight/obese and with both parents reporting chronic spinal pain had particularly low probability of recovery from activity limiting spinal pain, compared to those who were normal weight and had parents without chronic spinal pain (RR: 0.57, 95% CI: 0.39-0.84).

1  
2  
3 **Conclusion:** Offspring with chronic spinal pain are less likely to recover if they have parents  
4 with chronic spinal pain, particularly if offspring are overweight/obese.  
5  
6  
7  
8  
9

10 **Key words:** Low back pain, neck pain, chronic pain, obesity, family study, physical activity.  
11  
12  
13  
14

### 15 **Strengths and limitations of this study**

- 16 • The HUNT Study is a large population-based health study with longitudinal data that  
17 allows prospective analysis on the prognosis of chronic spinal pain.  
18
- 19 • Chronic spinal pain was independently reported in parents and offspring; family relations  
20 was informed by a linkage with a national registry; and the data allowed us to control for  
21 a wide range of potential confounders.  
22
- 23 • Information on pain status, physical activity, and body mass index was not updated  
24 throughout the follow-up period.  
25  
26  
27  
28  
29  
30  
31  
32  
33  
34  
35  
36  
37  
38  
39  
40  
41  
42  
43  
44  
45  
46  
47  
48  
49  
50  
51  
52  
53  
54  
55  
56  
57  
58  
59  
60

## INTRODUCTION

Spinal pain that includes low back and neck pain is highly prevalent and a common cause of disability worldwide.[1] The natural history of spinal pain is extremely variable and may last a few days or persist for many years.[2] A substantial proportion of patients recover within the first three months of a spinal pain episode, but around three quarters of the remaining patients are likely to experience pain one year after onset.[3, 4] People who fail to recover in the first few months following an acute episode are at greater risk of poor prognosis.[5] Spinal pain, especially in its chronic and disabling form, could be a significant personal and financial burden,[6] and may also influence families and society.[1] It is therefore vital to identify factors that influence prognosis of spinal pain, which in turn can inform preventive interventions to reduce chronicity.

Family studies have suggested that chronic pain aggregate in families,[7, 8] with the parent-offspring transmission of chronic pain explained by genetic heritability[9, 10] and shared environment factors.[11-14] The mean heritability of chronic low back pain is 67%,[10, 15] suggesting that a substantial proportion of the risk of developing chronic spinal pain is driven by genetics. However, families also share similar lifestyles and express similar health behaviours and beliefs. This suggests shared environmental factors[8, 16] could also have an important influence on the prognosis of spinal pain.[17, 18]

Parental pain is strongly associated with the increased risk of chronic musculoskeletal pain in offspring, both during adolescence,[7] and in later adulthood.[19] Furthermore, there is preliminary evidence that treatment response in patients with chronic low back pain is influenced by genetic factors.[20] It is, therefore, possible that parental history of spinal pain influences the



1  
2  
3 prognosis of spinal pain in offspring. Conversely, several studies have shown that engagement in  
4 moderate to vigorous-intensity leisure time physical activity and maintenance of a normal body  
5 mass index (BMI) are associated with better prognosis of spinal pain.[21-25] Thus, a healthy  
6 offspring lifestyle could modify a possible adverse effect of parental spinal pain on prognosis of  
7 offspring spinal pain. Currently, there is limited knowledge about the influence of parental spinal  
8 pain on prognosis of spinal pain in offspring and whether this association is modified by  
9 offspring lifestyle.  
10  
11  
12  
13  
14  
15  
16  
17  
18  
19  
20

21 In this study, we have used population-based longitudinal data from the Norwegian HUNT Study  
22 to investigate the influence of parental spinal pain on the prognosis of chronic spinal pain  
23 regarding severity and activity limitation in the adult offspring. We have also investigated  
24 whether offspring leisure time physical activity and BMI modify any of these associations.  
25  
26  
27  
28  
29  
30  
31  
32

## 33 **METHODS**

### 34 **Study population**

35 The HUNT Study is a population-based health study conducted within the county of Nord-  
36 Trøndelag, Norway. The study was performed in three consecutive waves, first in 1984–1986  
37 (HUNT1), then in 1995–1997 (HUNT2), and last in 2006–2008 (HUNT3). In all three surveys,  
38 all residents 20 years of age and older were invited to participate, and information on lifestyle  
39 and health-related factors were collected by questionnaires and a clinical examination.  
40  
41  
42  
43  
44  
45  
46  
47  
48

49 Information on musculoskeletal pain was not collected at HUNT1. Therefore, those who were  
50 eligible for inclusion in this study had participated at HUNT2 and HUNT3. At HUNT2, 93,898  
51 individuals were invited to participate, and 65,237 (65.5%) joined the study, while at HUNT3  
52  
53  
54  
55  
56  
57  
58  
59  
60

1  
2  
3 93,860 were invited and 50,807 (54.1%) agreed to participate.[26, 27] Each participant signed  
4  
5 written consent, and the study was approved by the Regional Committee for Medical and Health  
6  
7 Research Ethics Central Norway (ref. no. 2011/1455). Further information about selection  
8  
9 procedures, participation and questionnaires used in the HUNT study can be found at  
10  
11 <http://www.ntnu.edu/hunt>.  
12  
13  
14  
15

### 16 17 **Patient involvement**

18  
19 Since historical cohort data was used in this study, patients were not involved in the conduct and  
20  
21 design of the study.  
22  
23  
24  
25

### 26 27 **Record linkage**

28  
29 The unique 11-digit personal identification number held by all Norwegian citizens was used to  
30  
31 link each participant's record to information from the Family Registry at Statistics Norway, and  
32  
33 there by establish a link between parents and offspring who participated in one or both of  
34  
35 HUNT2 and HUNT3. The Family Registry provide data on persons registered as legal parents,  
36  
37 either as biological parents or through adoption. A total of 11,483 offspring reported spinal pain  
38  
39 at HUNT2, and of these, 6,662 could be followed-up on spinal pain status in HUNT3,  
40  
41 approximately 11 years later. To be able to study the association between parental spinal pain  
42  
43 and offspring prognosis of spinal pain, we selected all 1,529 parent-offspring trios (i.e., mother,  
44  
45 father and adult offspring) where both the mother and the father had information on spinal pain  
46  
47 from HUNT2.  
48  
49  
50  
51  
52  
53  
54  
55  
56  
57  
58  
59  
60

### **Chronic spinal pain**

At HUNT2 and HUNT3, participants were asked to complete the Standardized Nordic Questionnaire which has acceptable reliability and validity.[28] The question regarding musculoskeletal pain was as follows: “In the last year, have you had pain and/or stiffness in muscles or joints that have lasted at least 3 consecutive months?” (response options: “no” and “yes”). Participants who answered “yes” were asked to indicate the affected body area(s). Offspring who reported chronic neck and/or low back pain (spinal pain) at HUNT2 were included in this study, and offspring who also reported spinal pain at HUNT3 were considered not recovered (outcome measure). Offspring reporting spinal pain at HUNT2 were also asked to indicate if the pain had led to reduced leisure time activity (response options: “no” and “yes”) or reduced their work ability (response options: “no”, “to some extent”, “considerably” or “don’t know”). Offspring who answered “yes” to the question on reduced leisure time activity and/or reported work ability to be reduced “to some extent” or “considerably”, were classified as having “activity limiting spinal pain”. In secondary analyses, we used this information to investigate the prognosis of activity limiting spinal pain; i.e., recovery was defined as not reporting activity limiting spinal pain at HUNT3. Based on the same question as described above, we obtained information on parental chronic spinal pain. Further, we created a variable with four mutually exclusive categories for presence of parental chronic spinal pain at baseline (exposure measure): “none”, “mother”, “father” or “both parents”.

### **Leisure time physical activity**

Leisure time physical activity was assessed by the following question “How much of your leisure time have you been physically active during the last year? (Think of a weekly average for the

1  
2  
3 year. Your commute to work counts as leisure time)". Participants reported the number of hours  
4  
5 of either light (no sweating or heavy breathing) or hard (sweating and heavy breathing) activity  
6  
7 using the response options "none", "less than 1 hour", "1–2 hours" and "3 or more hours" for  
8  
9 each type of activity. Based on this information, we constructed a variable with four categories  
10  
11 (combining information on light and hard activity): 1) "inactive" (no light or hard activity), 2)  
12  
13 "low activity" (<3 hours light and no hard activity), 3) "moderate activity" ( $\geq 3$  hours light and/or  
14  
15 <1 hour hard activity), and 4) "high activity" (any light and  $\geq 1$  hour hard activity). In the  
16  
17 combined analyses of parental chronic spinal pain and offspring leisure time physical activity the  
18  
19 categories "inactive" and "low activity" were collapsed into one category labelled "Physically  
20  
21 inactive" and the categories "moderate activity" and "high activity" were collapsed into one  
22  
23 category labelled "Physically active". This categorization has been used previously in other  
24  
25 studies based in data from HUNT.[29, 30] We did not conduct analyses stratified by physical  
26  
27 activity status on the outcome "activity limiting spinal pain", since people with activity limiting  
28  
29 spinal pain are likely to have limited engagement in leisure and work activities.  
30  
31  
32  
33  
34  
35  
36  
37

### 38 **Body mass index**

39  
40 Standardized measurements of body height (to the nearest centimetre) and body weight (to the  
41  
42 nearest half kilogram) were obtained at clinical examination. BMI was calculated as weight  
43  
44 divided by the square of height ( $\text{kg/m}^2$ ), and classified into four BMI groups according to the  
45  
46 cut-off points suggested by the World Health Organization:[31] underweight ( $\text{BMI} < 18.5 \text{ kg/m}^2$ ),  
47  
48 normal weight ( $\text{BMI} 18.5\text{--}24.9 \text{ kg/m}^2$ ), overweight ( $\text{BMI} 25.0\text{--}29.9 \text{ kg/m}^2$ ) and obese ( $\text{BMI}$   
49  
50  $\geq 30.0 \text{ kg/m}^2$ ). Only 27 participants (1 %) were classified as "underweight", and the combined  
51  
52 analysis of parental chronic spinal pain and offspring BMI, the categories "underweight" and  
53  
54  
55  
56  
57  
58  
59  
60

1  
2  
3 “normal weight” were collapsed into one category labelled “normal weight”. The categories  
4  
5 “overweight” and “obese” were collapsed into one category labelled “overweight/obese”.  
6  
7  
8  
9

## 10 **Statistical analysis**

11  
12 We used a Poisson regression model[32-35] to estimate relative risk (RR) of chronic spinal pain  
13  
14 and activity limiting spinal pain in offspring whose parents reported chronic spinal pain, using  
15  
16 parents with no chronic spinal pain as the reference category. Precision of estimates was assessed  
17  
18 by a 95% confidence interval (CI). All standard errors were adjusted for within-family clustering  
19  
20 (i.e., siblings) using the vce (cluster) option in Stata, treating observations between families as  
21  
22 independent and within families as dependent, and thus avoiding inflated precision of the  
23  
24 estimated associations.[36]  
25  
26  
27  
28  
29

30  
31 Possible effect modification by offspring leisure time physical activity or offspring BMI was  
32  
33 assessed by stratified analyses (i.e., physically active vs physically inactive and normal weight vs  
34  
35 overweight/obese) as well as by tests of the estimated relative excess risk due to interaction  
36  
37 (RERI) (i.e., departure from additive effects). We calculated RERI estimates with 95% CIs from  
38  
39 the following equation:  $RERI = RR_{\text{parental pain \& physically active/overweight and/or obese}} - RR_{\text{noparental pain \&}}$   
40  
41  $RR_{\text{physically activity/ overweight and/or obese}} - RR_{\text{parental pain \& physically inactivity/normal weight}} + 1$ , [37] i.e.,  $RERI > 0$   
42  
43 indicate a synergistic effect beyond an additive effect. Statistical interaction was also evaluated  
44  
45 on a multiplicative scale by a likelihood ratio test of a product term in the model (these  
46  
47 likelihood ratio tests had to be run without cluster-adjusted standard errors to avoid  
48  
49 misspecification of the model).  
50  
51  
52  
53  
54  
55  
56  
57  
58  
59  
60

1  
2  
3 The main analyses (parental influence on risk of poor prognosis) were adjusted for possible  
4 confounding by offspring sex (male, female), age (continuous), BMI (“underweight”, “normal  
5 weight”, “overweight”, “obese” or “unknown”), leisure time physical activity (“physically  
6 inactive”, “physically active” or “unknown”), education (“<10 years”, “10–12 years”, “>13  
7 years” or “unknown”), and depression (“depressed”, “not depressed” or “unknown”). Depression  
8 was assessed using the depression subscale of the Hospital Anxiety and Depression Scale  
9 (HADs) using a score of 8 as a cut-off for a dichotomised variable.[38-40]  
10  
11  
12  
13  
14  
15  
16  
17  
18  
19  
20

21 All statistical tests were two-sided, and all analyses were conducted using Stata statistical  
22 software (version 13.0, STATA Corp., College Station, TX, USA).  
23  
24  
25  
26  
27

## 28 **RESULTS**

29  
30 In this prospective study of 1,529 offspring with chronic spinal pain at baseline, a total of 540  
31 (35%) offspring were defined as recovered after approximately 11 years of follow-up.  
32  
33

34 Additionally, among 775 offspring with activity limiting spinal pain, 244 were defined as  
35 recovered at follow-up. Descriptive statistics of offspring, mothers and fathers are shown in  
36 Table 1. The mean age at baseline was 32.8 (8.6) years among offspring. Most offspring were  
37 physically active (63.9%), and nearly half of the offspring (42.3%) were classified as overweight  
38 or obese. About one third (33.1%) of the offspring were current smokers, and just a small portion  
39 of offspring (20.7%) reported having a higher education degree. A small proportion (10.4%) of  
40 offspring had symptoms of depression according to the Hospital Anxiety and Depression Scale.  
41  
42  
43  
44  
45  
46  
47  
48  
49  
50  
51  
52  
53  
54  
55  
56  
57  
58  
59  
60

Table 1. Baseline characteristics of the study population at HUNT2

| Variables                                    | Offspring  | Mothers      | Fathers      |
|----------------------------------------------|------------|--------------|--------------|
| Participants, no.                            | 1,529      | 1,529        | 1,529        |
| Age, mean (SD)                               | 32.8 (8.6) | 63.8 (9.4)   | 67.2 (9.5)   |
| Body mass index, mean (SD)                   | 25.9 (5.2) | 28.3(7.3)    | 27.6 (6.9)   |
| Overweight/obese, % (n)                      | 42.3 (799) | 70.6 (1,080) | 72.2 (1,104) |
| Physically active <sup>a</sup> , % (n)       | 63.9 (977) | 43.0 (510)   | 57.7 (716)   |
| Current smoker, % (n)*                       | 33.1 (506) | 26.3 (400)   | 28.5 (434)   |
| Higher education <sup>b</sup> , % (n)        | 20.7 (316) | 4.5 (61)     | 6.0 (84)     |
| Symptoms of depression <sup>c</sup> , %, (n) | 10.4 (155) | 17.0 (225)   | 16.5 (215)   |

SD, standard deviation

<sup>a</sup>Engagement in moderate ( $\geq 3$  hours light and/or  $< 1$  hour hard activity per week) or high leisure time physical activity (any light and  $\geq 1$  hour hard activity per week)

<sup>b</sup>University education or higher

<sup>c</sup>Score  $\geq 8$  on the Hospital Anxiety and Depression Scale

### Chronic spinal pain and activity limiting spinal pain

Offspring with both parents reporting chronic spinal pain were less likely to recover from chronic spinal pain (RR: 0.83, 95% CI: 0.69, 0.99) and activity limiting spinal pain (RR: 0.71, 95% CI: 0.54-0.94) compared to offspring with no parents with chronic spinal pain (Table 2).

These associations were weaker and less precise when chronic spinal pain was present in only one parent, with similar associations observed for maternal and paternal spinal pain.

Table 2. Relative risk (RR) of recovery from spinal pain and activity limiting spinal pain in adult offspring associated with parental spinal pain.

| Parental spinal pain | Offspring spinal pain |              |          |                                      | Offspring activity limiting spinal pain |              |          |                                      |
|----------------------|-----------------------|--------------|----------|--------------------------------------|-----------------------------------------|--------------|----------|--------------------------------------|
|                      | No. of persons        | No. of cases | Crude RR | Adjusted RR <sup>a</sup><br>(95% CI) | No. of persons                          | No. of cases | Crude RR | Adjusted RR <sup>a</sup><br>(95% CI) |
| None                 | 346                   | 138          | 1.00     | 1.00 (Ref.)                          | 163                                     | 66           | 1.00     | 1.00 (Ref.)                          |
| Mother               | 424                   | 147          | 0.88     | 0.90<br>(0.75-1.07)                  | 214                                     | 62           | 0.73     | 0.74<br>(0.56-0.98)                  |
| Father               | 272                   | 97           | 0.90     | 0.91<br>(0.74-1.12)                  | 127                                     | 40           | 0.77     | 0.78<br>(0.57-1.05)                  |
| Both                 | 487                   | 158          | 0.82     | 0.83<br>(0.69-0.99)                  | 271                                     | 76           | 0.69     | 0.71<br>(0.54-0.94)                  |

CI, confidence interval

<sup>a</sup>Adjusted for age, sex, BMI, smoking, leisure time physical activity, education and HADS score.

### Physical activity

In the stratified analysis for physical activity, there was no strong evidence of effect modification for either physically active offspring (RR: 0.78; 95% CI: 0.62, 0.98), or physically inactive offspring (RR: 0.98; 95% CI: 0.71, 1.36) (Table 3). Tests of statistical interaction indicate no departure from neither multiplicative ( $p = 0.11$ ) nor additive effects (RERI: 0.19; 95% CI: -0.17, 0.55), data not shown.



Table 3. Relative risk (RR) of recovery from spinal pain in adult offspring associated with parental spinal pain; analysis stratified by leisure time physical activity.

|                      | Physically active |              |                                   | Physical inactive |              |                                   |
|----------------------|-------------------|--------------|-----------------------------------|-------------------|--------------|-----------------------------------|
|                      | No. of persons    | No. of cases | Adjusted RR <sup>a</sup> (95% CI) | No. of persons    | No. of cases | Adjusted RR <sup>a</sup> (95% CI) |
| Parental spinal pain |                   |              |                                   |                   |              |                                   |
| None                 | 229               | 97           | 1.00 (Ref.)                       | 111               | 40           | 1.00 (Ref.)                       |
| Mother or father     | 434               | 163          | 0.94 (0.77-1.14)                  | 246               | 74           | 0.82 (0.60-1.11)                  |
| Both parents         | 314               | 100          | 0.78 (0.62-0.98)                  | 166               | 58           | 0.98 (0.71-1.35)                  |

CI: confidence interval

<sup>a</sup>Adjusted for age, sex, BMI, smoking, education and HADS score.

### Body mass index

In the stratified analysis for body mass index, there was no strong evidence of effect modification. However, offspring who were overweight or obese and with both parents reporting chronic spinal pain had the lowest probability of recovery from activity limiting spinal pain or chronic spinal pain (RR: 0.57; 95% CI: 0.39, 0.84 and RR: 0.79; 95% CI: 0.61, 1.03, respectively), compared to those who were normal weight and had parents without chronic spinal pain (Table 4). In addition, there was no clear evidence of statistical interaction neither on the additive (estimates of RERI for chronic spinal pain and activity limiting spinal pain were -0.04; 95% CI: -0.38, 0.30 and -0.34; 95% CI: -0.91, 0.23, respectively) nor on the multiplicative scale ( $p = 0.54$  and  $p = 0.20$ , respectively).

Table 4. Relative risk (RR) of recovery from spinal pain and activity limiting spinal pain in adult offspring associated with parental spinal pain; analysis stratified by BMI.

| Variables                               | Normal weight  |              |                                   | Overweight/obese |              |                                   |
|-----------------------------------------|----------------|--------------|-----------------------------------|------------------|--------------|-----------------------------------|
|                                         | No. of persons | No. of cases | Adjusted RR <sup>a</sup> (95% CI) | No. of persons   | No. of cases | Adjusted RR <sup>a</sup> (95% CI) |
| Offspring spinal pain                   |                |              |                                   |                  |              |                                   |
| Parental spinal pain                    |                |              |                                   |                  |              |                                   |
| None                                    | 168            | 68           | 1.00 (Ref.)                       | 177              | 69           | 1.00 (Ref.)                       |
| Mother or father                        | 316            | 111          | 0.88<br>(0.70-1.12)               | 380              | 133          | 0.89<br>(0.70-1.12)               |
| Both parents                            | 242            | 82           | 0.86<br>(0.66-1.11)               | 242              | 76           | 0.79<br>(0.61-1.03)               |
| Offspring activity limiting spinal pain |                |              |                                   |                  |              |                                   |
| Parental spinal pain                    |                |              |                                   |                  |              |                                   |
| None                                    | 86             | 34           | 1.00 (Ref.)                       | 130              | 50           | 1.00 (Ref.)                       |
| Mother or father                        | 151            | 42           | 0.72<br>(0.49-1.04)               | 301              | 98           | 0.72<br>(0.51-0.99)               |
| Both parents                            | 129            | 41           | 0.84<br>(0.57-1.24)               | 188              | 52           | 0.57<br>(0.39-0.84)               |

CI: confidence interval.

<sup>a</sup>Adjusted for age, sex, leisure physical activity, smoking, education and depression.

## DISCUSSION

### Summary of findings

The findings of this large population-based prospective family-linkage study indicate that offspring with both parents reporting chronic spinal pain are less likely to recover from chronic spinal pain and activity limiting spinal pain compared with offspring with no parent with spinal pain. Overall, there was no strong evidence that physical activity or body mass index modified these associations, although the results suggest that the inverse association between parental spinal pain and recovery from activity limiting spinal pain was strongest among offspring with a high BMI. This study supports the evidence from twin studies that genetics potentially influences recovery from chronic spinal pain,[41] but these intergenerational associations incorporate shared environmental factors and shared beliefs that could influence recovery. For instance, there is evidence showing that negative beliefs about pain and negative expectations about recovery predict chronic and disabling spinal pain.[42-44] It seems clear that it is important to consider the family history of chronic spinal pain as well as lifestyle behaviours when identifying people at higher risk of non-recovery.

### Comparison of findings with previous research

A recent systematic review showed that offspring of parents with chronic pain have poorer outcomes regarding pain, general health, psychological, and family functioning as compared to offspring of parents without pain.[45] The inter-generational transmission of spinal pain could be explained by genetic heritability[9, 10] or a family shared environment.[11-14] Moreover, it has

1  
2  
3 been suggested that the genetic influence is greater in more disabling pain conditions, such as  
4 chronic widespread pain and chronic activity limiting spinal pain, rather than in acute or sub-  
5 acute non-debilitating pain.[9, 10] It is widely accepted that lifestyle factors, such as physical  
6 activity and body weight, also play a significant role in the prognosis of chronic musculoskeletal  
7 pain.[46]  
8  
9  
10  
11  
12  
13  
14  
15  
16

17 Some studies have suggested that people with chronic back pain who regularly engage in leisure  
18 time physical activity have better prognosis measured in terms of pain, disability, and quality of  
19 life than those who are sedentary.[29, 47] However, there remains conflicting evidence regarding  
20 how physical activity influences the prognosis of spinal pain,[48] with studies demonstrating that  
21 both low and high levels of physical activity can negatively influence the prognosis of spinal  
22 pain.[49, 50] For instance, a study found that high leisure time physical activity was related to  
23 decreased prevalence of low back pain.[51] Whereas another study found that either high or low  
24 levels of leisure time physical activity was related to increased prevalence of low back pain.[49]  
25 In contrast, a prospective study did not find any significant association between moderate/high  
26 levels of leisure physical activity and low back pain in young adults.[52] Another follow-up  
27 study found that regular habits of leisure physical activity have no effect on recovery from low  
28 back pain.[53] The inconsistency in the literature is possibly attributed to the diverse definitions  
29 and classifications of levels of physical activity. If such divergent associations with leisure time  
30 physical activity exist this could mask a possible modifying effect of physical activity in our  
31 analyses.  
32  
33  
34  
35  
36  
37  
38  
39  
40  
41  
42  
43  
44  
45  
46  
47  
48  
49  
50  
51  
52  
53  
54  
55  
56  
57  
58  
59  
60

1  
2  
3 The literature has provided evidence that obesity is associated with poor outcomes in people with  
4 chronic widespread pain,[54, 55] as well as chronic spinal pain[29, 56, 57] and also decreases the  
5 probability of recovery from chronic spinal pain regardless of the care they receive,[25]  
6  
7  
8 however, whether BMI could modify[30] the relationship between parental spinal pain on  
9  
10 offspring recovery from chronic spinal pain has not been investigated before. Our results suggest  
11  
12 that offspring BMI may modify on the parent-offspring association of spinal pain, with  
13  
14 somewhat stronger associations among offspring who were classified as overweight or obese  
15  
16 than those who were underweight or normal weight. Research has shown that inter-individual  
17  
18 differences in pain sensitivity and endogenous pain-inhibitory capacity could reflect variations in  
19  
20 the inherent susceptibility for chronic pain,[58, 59] but that a triggering exposure is required for  
21  
22 the development of chronic pain.[60, 61] This could suggest that a possible genetic susceptibility  
23  
24 for poor recovery from chronic pain[62, 63] as a higher penetrance between offspring who are  
25  
26 overweight or obese.  
27  
28  
29  
30  
31  
32  
33  
34

### 35 **Strengths and limitations**

36  
37 This study has several strengths including the prospective design utilising a large population-  
38  
39 based sample with a long follow-up period. In addition, the registry based information on family  
40  
41 relations allowed us to include information on chronic spinal pain obtained from parents and  
42  
43 offspring independently and at different time points. An important aspect is that the offspring  
44  
45 were adults at the time of data collection, indicating that the parent-to-offspring association of  
46  
47 chronic spinal pain persists into adulthood when the offspring most likely live apart from their  
48  
49 parents. Furthermore, we were able to adjust for several offspring characteristics that could  
50  
51 confound the parent-offspring associations of chronic spinal pain, such as age,[64] BMI,[57]  
52  
53  
54  
55  
56  
57  
58  
59  
60

1  
2  
3 leisure physical activity,[65] smoking,[64] depression[64] and education.[10, 66] However, we  
4 cannot exclude the possible residual confounding attributable to unknown or unmeasured factors.  
5  
6  
7  
8  
9

10 There are some limitations that should be taken into account. First, information on chronic spinal  
11 pain was only reported at baseline and at follow-up 10-11 years later, with no information on  
12 possible changes in the status of chronic spinal pain during the follow-up period. Consequently, a  
13 person could have recovered from spinal pain at some time-point between the surveys, but still  
14 report pain at follow-up. However, if parental pain reflects an underlying heritable frailty, this  
15 may have an impact also on long-term recurrence and recovery from pain. Likewise, information  
16 on leisure time physical activity and BMI was only assessed at baseline, with no information on  
17 possible changes during the follow-up period. Second, although the questions about leisure time  
18 physical activity used in this study have been reported to have good reliability and provide useful  
19 measures of leisure physical activity,[67] subjective interpretations of the activity questions  
20 could have influenced the results. Besides, it is well known that self-reports may lead to under or  
21 overestimation of the variables of interest.[68] Third, a premise for inclusion into this study was  
22 that the mother, father and offspring all had to participate in the health survey. To some extent,  
23 this may have resulted in a selected and more health conscious sample than the general  
24 population. Nevertheless, it is questionable whether representativeness is a prerequisite for  
25 making valid risk assessments in epidemiological studies.[57] Fourth, although the Norwegian  
26 Family registry was used to identify family relations between parents and offspring,  
27 misclassification of biological family relations in the registry due to adoptions and non-paternity  
28 is possible. Although the influence on our results is likely to be small, such misclassification  
29 could give attenuated parent-offspring associations. Moreover, we had no information on  
30  
31  
32  
33  
34  
35  
36  
37  
38  
39  
40  
41  
42  
43  
44  
45  
46  
47  
48  
49  
50  
51  
52  
53  
54  
55  
56  
57  
58  
59  
60

1  
2  
3 whether the offspring shared environment with none, one or both of their biological parents  
4  
5 during childhood. Finally, residual confounding due to unmeasured or unknown factors cannot  
6  
7 be ruled out.  
8  
9

## 11 12 **CONCLUSION**

13  
14 Offspring with chronic spinal pain are less likely to recover if they have parents with chronic  
15  
16 spinal pain compared to offspring without parental chronic spinal pain. This association is  
17  
18 stronger when the offspring present pain that interferes with their usual work and leisure  
19  
20 activities (activity limiting spinal pain). The inverse association between parental chronic spinal  
21  
22 pain on recovery was somewhat stronger among offspring who were overweight or obese. The  
23  
24 association between parental chronic spinal pain and the prognosis of chronic spinal pain in the  
25  
26 adult offspring underlines the importance of identifying those at high risk of non-recovery since  
27  
28 they account for significant social and individual financial burden. Therefore, clinicians should  
29  
30 consider family history of spinal pain when implementing strategies to improve recovery from  
31  
32 chronic spinal pain, chronic spinal pain. For instance, the assessment of the potential risks of  
33  
34 physical activity and education about the range of benefits, as well as highlights the importance  
35  
36 of maintenance of a normal body weight.  
37  
38  
39  
40  
41  
42  
43  
44  
45  
46

## 47 **Acknowledgements**

48  
49 The HUNT Study is collaboration between the HUNT Research Centre (Faculty of Medicine,  
50  
51 Norwegian University of Science and Technology (NTNU), Nord-Trøndelag County Council,  
52  
53 Central Norway Regional Health Authority, and the Norwegian Institute of Public Health. ABA  
54  
55  
56  
57  
58  
59  
60

1  
2  
3 holds the International Post-graduate Research Scholarship “Science without Borders” award  
4  
5 from the Brazilian Government. PHF is funded by a NHMRC Research Fellowship and  
6  
7 University of Sydney SOAR Fellowship. MLF holds a MRFF/NHMRC Career Development  
8  
9 Fellowship and is a Sydney Medical Foundation Fellow.  
10  
11  
12  
13

14  
15 **Competing Interests:** None declared.  
16  
17

18  
19 **Funding Statement:** This research was supported by a grant from the Department of Public  
20  
21 Health and Nursing, Norwegian University of Science and Technology, Trondheim, Norway.  
22  
23 However, this funding source had no role in the study’s design, data collection, analysis,  
24  
25 interpretation of the data, or the decision to submit the paper for publication.  
26  
27  
28  
29  
30

### 31 **Author Contributions**

32  
33 All authors critically revised the manuscript for important intellectual content and approved the  
34  
35 final manuscript. Please find below a detailed description of the role of each author:  
36  
37

- 38  
39 - Anita B Amorim: conception and design, analysis and interpretation of data, drafting and  
40  
41 revision of the manuscript, and final approval of the version to be published.  
42
- 43 - Paulo H Ferreira: conception and design, interpretation of data, drafting and revision of  
44  
45 the manuscript, and final approval of the version to be published.  
46  
47
- 48 - Manuela L Ferreira: conception and design, drafting and revision of the manuscript, and  
49  
50 final approval of the version to be published.  
51
- 52 - Ragnhild Lier: conception and design, drafting and revision of the manuscript, and final  
53  
54 approval of the version to be published.  
55  
56  
57



- 1  
2  
3 - Milena Simic: conception and design, drafting and revision of the manuscript, and final  
4 approval of the version to be published.  
5  
6
- 7  
8 - Evangelos Pappas: conception and design, drafting and revision of the manuscript, and  
9 final approval of the version to be published.  
10  
11
- 12 - Joshua R Zadro: conception and design, interpretation of data, drafting and revision of  
13 the manuscript, and final approval of the version to be published.  
14  
15
- 16 - Paul Jarle Mork: conception and design, acquisition and interpretation of data, drafting  
17 and revision of the manuscript and final approval of the version to be published.  
18  
19
- 20 - Tom Ivar Lund Nilsen: conception and design, acquisition and interpretation of data,  
21 drafting and revision of the manuscript and final approval of the version to be published.  
22  
23  
24  
25

26  
27  
28 **Data sharing statement:** No additional data available.  
29  
30  
31  
32  
33  
34  
35  
36  
37  
38  
39  
40  
41  
42  
43  
44  
45  
46

## 47 REFERENCES

48  
49  
50

- 51 1. Mortality, G.B.D. and C. Causes of Death, *Global, regional, and national life*  
52 *expectancy, all-cause mortality, and cause-specific mortality for 249 causes of death,*  
53  
54  
55  
56  
57  
58  
59  
60

- 1  
2  
3  
4  
5  
6  
7  
8  
9  
10  
11  
12  
13  
14  
15  
16  
17  
18  
19  
20  
21  
22  
23  
24  
25  
26  
27  
28  
29  
30  
31  
32  
33  
34  
35  
36  
37  
38  
39  
40  
41  
42  
43  
44  
45  
46  
47  
48  
49  
50  
51  
52  
53  
54  
55  
56  
57  
58  
59  
60
- 1980-2015: a systematic analysis for the Global Burden of Disease Study 2015. *Lancet*, 2016. **388**(10053): p. 1459-1544.
2. Vasseljen, O., et al., *Natural course of acute neck and low back pain in the general population: the HUNT study*. *Pain*, 2013. **154**(8): p. 1237-44.
3. Croft, P.R., et al., *Outcome of low back pain in general practice: a prospective study*. *BMJ*, 1998. **316**(7141): p. 1356-9.
4. Itz, C.J., et al., *Clinical course of non-specific low back pain: a systematic review of prospective cohort studies set in primary care*. *Eur J Pain*, 2013. **17**(1): p. 5-15.
5. Kent, P.M. and J.L. Keating, *Can we predict poor recovery from recent-onset nonspecific low back pain? A systematic review*. *Man Ther*, 2008. **13**(1): p. 12-28.
6. Gore, M., et al., *The burden of chronic low back pain: clinical comorbidities, treatment patterns, and health care costs in usual care settings*. *Spine (Phila Pa 1976)*, 2012. **37**(11): p. E668-77.
7. Hoftun, G.B., P.R. Romundstad, and M. Rygg, *Association of parental chronic pain with chronic pain in the adolescent and young adult: family linkage data from the HUNT Study*. *JAMA Pediatr*, 2013. **167**(1): p. 61-9.
8. Saunders, K., et al., *Relationship of common pain conditions in mothers and children*. *Clin J Pain*, 2007. **23**(3): p. 204-13.
9. Kato, K., et al., *Importance of genetic influences on chronic widespread pain*. *Arthritis Rheum*, 2006. **54**(5): p. 1682-6.
10. Hocking, L.J., et al., *Heritability of chronic pain in 2195 extended families*. *Eur J Pain*, 2012. **16**(7): p. 1053-63.

- 1  
2  
3 11. Violon, A. and D. Giurgea, *Familial models for chronic pain*. Pain, 1984. **18**(2): p. 199-  
4 203.  
5  
6
- 7  
8 12. Pollard, C.A., *Family history and severity of disability associated with chronic low back*  
9 *pain*. Psychol Rep, 1985. **57**(3 Pt 1): p. 813-4.  
10  
11
- 12 13. Payne, B. and M.A. Norfleet, *Chronic pain and the family: a review*. Pain, 1986. **26**(1): p.  
13 1-22.  
14  
15
- 16 14. Bruehl, S., et al., *How accurate are parental chronic pain histories provided by*  
17 *offspring?* Pain, 2005. **115**(3): p. 390-7.  
18  
19
- 20 15. Ferreira, P.H., et al., *Nature or nurture in low back pain? Results of a systematic review*  
21 *of studies based on twin samples*. Eur J Pain, 2013. **17**(7): p. 957-71.  
22  
23
- 24 16. Levy, R.L. and S.L. Langer, *Pain, disability, and symptoms among siblings of children*  
25 *with functional abdominal pain*. J Dev Behav Pediatr, 2007. **28**(1): p. 45-6.  
26  
27
- 28 17. Cardol, M., et al., *All in the family: headaches and abdominal pain as indicators for*  
29 *consultation patterns in families*. Ann Fam Med, 2006. **4**(6): p. 506-11.  
30  
31
- 32 18. Cardol, M., et al., *Striking variations in consultation rates with general practice reveal*  
33 *family influence*. BMC Fam Pract, 2007. **8**: p. 4.  
34  
35
- 36 19. Lier, R., T.I. Nilsen, and P.J. Mork, *Parental chronic pain in relation to chronic pain in*  
37 *their adult offspring: family-linkage within the HUNT Study, Norway*. BMC Public  
38 Health, 2014. **14**: p. 797.  
39  
40
- 41 20. Luchting, B., et al., *Expression of miRNA-124a in CD4 Cells Reflects Response to a*  
42 *Multidisciplinary Treatment Program in Patients With Chronic Low Back Pain*. Spine  
43 (Phila Pa 1976), 2017. **42**(4): p. E226-E233.  
44  
45  
46  
47  
48  
49  
50  
51  
52  
53  
54  
55  
56  
57  
58  
59  
60

- 1  
2  
3 21. Blangsted, A.K., et al., *One-year randomized controlled trial with different physical-*  
4 *activity programs to reduce musculoskeletal symptoms in the neck and shoulders among*  
5 *office workers.* Scand J Work Environ Health, 2008. **34**(1): p. 55-65.  
6  
7
- 8  
9  
10 22. Linton, S.J. and M.W. van Tulder, *Preventive interventions for back and neck pain*  
11 *problems: what is the evidence?* Spine (Phila Pa 1976), 2001. **26**(7): p. 778-87.  
12  
13
- 14 23. van den Heuvel, S.G., et al., *The effect of physical activity in leisure time on neck and*  
15 *upper limb symptoms.* Prev Med, 2005. **41**(1): p. 260-7.  
16  
17
- 18 24. Krismer, M., et al., *Strategies for prevention and management of musculoskeletal*  
19 *conditions. Low back pain (non-specific).* Best Pract Res Clin Rheumatol, 2007. **21**(1): p.  
20 77-91.  
21  
22
- 23 25. Ewald, S.C., E.L. Hurwitz, and A. Kizhakkeveetil, *The effect of obesity on treatment*  
24 *outcomes for low back pain.* Chiropr Man Therap, 2016. **24**: p. 48.  
25  
26
- 27 26. Krokstad, S., et al., *Cohort Profile: the HUNT Study, Norway.* Int J Epidemiol, 2013.  
28 **42**(4): p. 968-77.  
29  
30
- 31 27. Langhammer, A., et al., *The HUNT study: participation is associated with survival and*  
32 *depends on socioeconomic status, diseases and symptoms.* BMC Med Res Methodol,  
33 2012. **12**: p. 143.  
34  
35
- 36 28. Kuorinka, I., et al., *Standardised Nordic questionnaires for the analysis of*  
37 *musculoskeletal symptoms.* Appl Ergon, 1987. **18**(3): p. 233-7.  
38  
39
- 40 29. Nilsen, T.I., A. Holtermann, and P.J. Mork, *Physical exercise, body mass index, and risk*  
41 *of chronic pain in the low back and neck/shoulders: longitudinal data from the Nord-*  
42 *Trondelag Health Study.* Am J Epidemiol, 2011. **174**(3): p. 267-73.  
43  
44  
45  
46  
47  
48  
49  
50  
51  
52  
53  
54  
55  
56  
57  
58  
59  
60

- 1  
2  
3 30. Lier, R., et al., *Familial Risk of Chronic Musculoskeletal Pain and the Importance of*  
4 *Physical Activity and Body Mass Index: Prospective Data from the HUNT Study,*  
5 *Norway.* PLoS One, 2016. **11**(4): p. e0153828.  
6  
7  
8  
9  
10 31. *Physical status: The Use and Interpretation of Anthropometry. Report of a WHO Expert*  
11 *Committee.*  
12  
13  
14  
15 (*WHO Technical Report Series no. 854*). , W.T.R.S.n. 854). Editor. 1995: Geneva: World Health  
16 Organization.  
17  
18  
19  
20 32. Altman, D.G., et al., *Prognosis and prognostic research: validating a prognostic model.*  
21 *BMJ*, 2009. **338**: p. b605.  
22  
23  
24 33. Moons, K.G., et al., *Prognosis and prognostic research: application and impact of*  
25 *prognostic models in clinical practice.* *BMJ*, 2009. **338**: p. b606.  
26  
27  
28  
29 34. Moons, K.G., et al., *Prognosis and prognostic research: what, why, and how?* *BMJ*,  
30 2009. **338**: p. b375.  
31  
32  
33  
34 35. Royston, P., et al., *Prognosis and prognostic research: Developing a prognostic model.*  
35 *BMJ*, 2009. **338**: p. b604.  
36  
37  
38 36. Martin, R.M., et al., *Parents' growth in childhood and the birth weight of their offspring.*  
39 *Epidemiology*, 2004. **15**(3): p. 308-16.  
40  
41  
42  
43 37. Andersson, T., et al., *Calculating measures of biological interaction.* *Eur J Epidemiol*,  
44 2005. **20**(7): p. 575-9.  
45  
46  
47 38. Snaith, R.P., *The Hospital Anxiety And Depression Scale.* Health Qual Life Outcomes,  
48 2003. **1**: p. 29.  
49  
50  
51 39. Bjelland, I., et al., *The validity of the Hospital Anxiety and Depression Scale. An updated*  
52 *literature review.* *J Psychosom Res*, 2002. **52**(2): p. 69-77.  
53  
54  
55  
56  
57  
58  
59  
60

- 1  
2  
3 40. Zigmond, A.S. and R.P. Snaith, *The hospital anxiety and depression scale*. Acta  
4  
5 Psychiatr Scand, 1983. **67**(6): p. 361-70.  
6  
7  
8 41. Zadro, J.R., et al., *Does Familial Aggregation of Chronic Low Back Pain Affect*  
9  
10 *Recovery?: A Population-Based Twin Study*. Spine (Phila Pa 1976), 2017. **42**(17): p.  
11  
12 1295-1301.  
13  
14 42. Urquhart, D.M., et al., *Negative beliefs about low back pain are associated with high*  
15  
16 *pain intensity and high level disability in community-based women*. BMC Musculoskelet  
17  
18 *Disord*, 2008. **9**: p. 148.  
19  
20  
21 43. Wertli, M.M., et al., *Catastrophizing-a prognostic factor for outcome in patients with low*  
22  
23 *back pain: a systematic review*. Spine J, 2014. **14**(11): p. 2639-57.  
24  
25  
26 44. Fujii, T., K. Matsudaira, and H. Oka, *Factors associated with fear-avoidance beliefs*  
27  
28 *about low back pain*. J Orthop Sci, 2013. **18**(6): p. 909-15.  
29  
30  
31 45. Higgins, K.S., et al., *Offspring of parents with chronic pain: a systematic review and*  
32  
33 *meta-analysis of pain, health, psychological, and family outcomes*. Pain, 2015. **156**(11):  
34  
35 p. 2256-66.  
36  
37  
38 46. Dean, E. and A. Soderlund, *What is the role of lifestyle behaviour change associated with*  
39  
40 *non-communicable disease risk in managing musculoskeletal health conditions with*  
41  
42 *special reference to chronic pain?* BMC Musculoskelet Disord, 2015. **16**: p. 87.  
43  
44  
45 47. Pinto, R.Z., et al., *Self-reported moderate-to-vigorous leisure time physical activity*  
46  
47 *predicts less pain and disability over 12 months in chronic and persistent low back pain*.  
48  
49 *Eur J Pain*, 2014. **18**(8): p. 1190-8.  
50  
51  
52 48. Sitthipornvorakul, E., et al., *The association between physical activity and neck and low*  
53  
54 *back pain: a systematic review*. Eur Spine J, 2011. **20**(5): p. 677-89.  
55  
56  
57  
58  
59  
60

- 1  
2  
3 49. Heneweer, H., L. Vanhees, and H.S. Picavet, *Physical activity and low back pain: a U-*  
4 *shaped relation?* Pain, 2009. **143**(1-2): p. 21-5.  
5  
6  
7  
8 50. Heneweer, H., et al., *Physical activity and low back pain: a systematic review of recent*  
9 *literature.* Eur Spine J, 2011. **20**(6): p. 826-45.  
10  
11  
12 51. Hartvigsen, J. and K. Christensen, *Active lifestyle protects against incident low back pain*  
13 *in seniors: a population-based 2-year prospective study of 1387 Danish twins aged 70-*  
14 *100 years.* Spine (Phila Pa 1976), 2007. **32**(1): p. 76-81.  
15  
16  
17 52. Lunde, L.K., et al., *Low back pain and physical activity--A 6.5 year follow-up among*  
18 *young adults in their transition from school to working life.* BMC Public Health, 2015.  
19  
20  
21  
22  
23  
24  
25  
26  
27 53. Mortimer, M., G. Pernold, and C. Wiktorin, *Low back pain in a general population.*  
28 *Natural course and influence of physical exercise--a 5-year follow-up of the*  
29 *Musculoskeletal Intervention Center-Norrtalje Study.* Spine (Phila Pa 1976), 2006.  
30  
31  
32  
33  
34  
35  
36 54. Magnusson, K., K.B. Hagen, and B. Natvig, *Individual and joint effects of risk factors for*  
37 *onset widespread pain and obesity - a population-based prospective cohort study.* Eur J  
38 Pain, 2016. **20**(7): p. 1102-10.  
39  
40  
41  
42 55. Mundal, I., et al., *Prevalence and long-term predictors of persistent chronic widespread*  
43 *pain in the general population in an 11-year prospective study: the HUNT study.* BMC  
44 Musculoskelet Disord, 2014. **15**: p. 213.  
45  
46  
47  
48  
49 56. Mork, P.J., et al., *Sleep problems, exercise and obesity and risk of chronic*  
50 *musculoskeletal pain: the Norwegian HUNT study.* Eur J Public Health, 2014. **24**(6): p.  
51  
52  
53  
54  
55  
56  
57  
58  
59  
60

- 1  
2  
3 57. Ray, L., et al., *Mechanisms of association between obesity and chronic pain in the*  
4 *elderly*. Pain, 2011. **152**(1): p. 53-9.  
5  
6  
7 58. Edwards, R.R., *Individual differences in endogenous pain modulation as a risk factor for*  
8 *chronic pain*. Neurology, 2005. **65**(3): p. 437-43.  
9  
10  
11 59. Bradley, L.A., *Pathophysiologic mechanisms of fibromyalgia and its related disorders*. J  
12 Clin Psychiatry, 2008. **69 Suppl 2**: p. 6-13.  
13  
14  
15 60. Buskila, D. and L. Neumann, *Genetics of fibromyalgia*. Curr Pain Headache Rep, 2005.  
16 **9**(5): p. 313-5.  
17  
18  
19 61. Mogil, J.S., *Pain genetics: past, present and future*. Trends Genet, 2012. **28**(6): p. 258-  
20 66.  
21  
22  
23 62. Pollard, T.C., et al., *Genetic predisposition to the presence and 5-year clinical*  
24 *progression of hip osteoarthritis*. Osteoarthritis Cartilage, 2012. **20**(5): p. 368-75.  
25  
26  
27 63. Holliday, K.L. and J. McBeth, *Recent advances in the understanding of genetic*  
28 *susceptibility to chronic pain and somatic symptoms*. Curr Rheumatol Rep, 2011. **13**(6):  
29 p. 521-7.  
30  
31  
32 64. Cimmino, M.A., C. Ferrone, and M. Cutolo, *Epidemiology of chronic musculoskeletal*  
33 *pain*. Best Pract Res Clin Rheumatol, 2011. **25**(2): p. 173-83.  
34  
35  
36 65. Holth, H.S., et al., *Physical inactivity is associated with chronic musculoskeletal*  
37 *complaints 11 years later: results from the Nord-Trondelag Health Study*. BMC  
38 Musculoskelet Disord, 2008. **9**: p. 159.  
39  
40  
41 66. Hagen, K., et al., *Low socioeconomic status is associated with chronic musculoskeletal*  
42 *complaints among 46,901 adults in Norway*. Scand J Public Health, 2005. **33**(4): p. 268-  
43 75.  
44  
45  
46  
47  
48  
49  
50  
51  
52  
53  
54  
55  
56  
57  
58  
59  
60



- 1  
2  
3 67. Kurtze, N., et al., *Reliability and validity of self-reported physical activity in the Nord-*  
4 *Trondelag Health Study (HUNT 2)*. Eur J Epidemiol, 2007. **22**(6): p. 379-87.  
5  
6  
7  
8 68. Ainsworth, B., et al., *The current state of physical activity assessment tools*. Prog  
9  
10 Cardiovasc Dis, 2015. **57**(4): p. 387-95.  
11  
12  
13  
14  
15  
16  
17  
18  
19  
20  
21  
22  
23  
24  
25  
26  
27  
28  
29  
30  
31  
32  
33  
34  
35  
36  
37  
38  
39  
40  
41  
42  
43  
44  
45  
46  
47  
48  
49  
50  
51  
52  
53  
54  
55  
56  
57  
58  
59  
60

For peer review only

# Reporting checklist for cohort study.

Based on the STROBE cohort guidelines.

## Instructions to authors

Complete this checklist by entering the page numbers from your manuscript where readers will find each of the items listed below.

Your article may not currently address all the items on the checklist. Please modify your text to include the missing information. If you are certain that an item does not apply, please write "n/a" and provide a short explanation.

Upload your completed checklist as an extra file when you submit to a journal.

In your methods section, say that you used the STROBE cohort reporting guidelines, and cite them as:

von Elm E, Altman DG, Egger M, Pocock SJ, Gøtzsche PC, Vandenbroucke JP. The Strengthening the Reporting of Observational Studies in Epidemiology (STROBE) Statement: guidelines for reporting observational studies.

|                        |     | Reporting Item                                                                                                                  | Page Number |
|------------------------|-----|---------------------------------------------------------------------------------------------------------------------------------|-------------|
| Title                  | #1a | Indicate the study's design with a commonly used term in the title or the abstract                                              | 1           |
| Abstract               | #1b | Provide in the abstract an informative and balanced summary of what was done and what was found                                 | 2           |
| Background / rationale | #2  | Explain the scientific background and rationale for the investigation being reported                                            | 4           |
| Objectives             | #3  | State specific objectives, including any prespecified hypotheses                                                                | 5           |
| Study design           | #4  | Present key elements of study design early in the paper                                                                         | 5           |
| Setting                | #5  | Describe the setting, locations, and relevant dates, including periods of recruitment, exposure, follow-up, and data collection | 5           |
| Eligibility criteria   | #6a | Give the eligibility criteria, and the sources and methods of selection of participants. Describe methods of follow-up.         | 5           |

|    |                  |      |                                                                   |          |
|----|------------------|------|-------------------------------------------------------------------|----------|
| 1  |                  | #6b  | For matched studies, give matching criteria and number of         | 6        |
| 2  |                  |      | exposed and unexposed                                             |          |
| 3  |                  |      |                                                                   |          |
| 4  |                  |      |                                                                   |          |
| 5  | Variables        | #7   | Clearly define all outcomes, exposures, predictors, potential     | 6, 7 and |
| 6  |                  |      | confounders, and effect modifiers. Give diagnostic criteria, if   | 8        |
| 7  |                  |      | applicable                                                        |          |
| 8  |                  |      |                                                                   |          |
| 9  |                  |      |                                                                   |          |
| 10 | Data sources /   | #8   | For each variable of interest give sources of data and details of | See note |
| 11 | measurement      |      | methods of assessment (measurement). Describe                     | 1        |
| 12 |                  |      | comparability of assessment methods if there is more than one     |          |
| 13 |                  |      | group. Give information separately for for exposed and            |          |
| 14 |                  |      | unexposed groups if applicable.                                   |          |
| 15 |                  |      |                                                                   |          |
| 16 |                  |      |                                                                   |          |
| 17 |                  |      |                                                                   |          |
| 18 | Bias             | #9   | Describe any efforts to address potential sources of bias         | 8        |
| 19 |                  |      |                                                                   |          |
| 20 |                  |      |                                                                   |          |
| 21 | Study size       | #10  | Explain how the study size was arrived at                         | 6        |
| 22 |                  |      |                                                                   |          |
| 23 | Quantitative     | #11  | Explain how quantitative variables were handled in the            | 8        |
| 24 | variables        |      | analyses. If applicable, describe which groupings were chosen,    |          |
| 25 |                  |      | and why                                                           |          |
| 26 |                  |      |                                                                   |          |
| 27 |                  |      |                                                                   |          |
| 28 | Statistical      | #12a | Describe all statistical methods, including those used to control | 8 and 9  |
| 29 | methods          |      | for confounding                                                   |          |
| 30 |                  |      |                                                                   |          |
| 31 |                  |      |                                                                   |          |
| 32 |                  | #12b | Describe any methods used to examine subgroups and                | 8 and 9  |
| 33 |                  |      | interactions                                                      |          |
| 34 |                  |      |                                                                   |          |
| 35 |                  |      |                                                                   |          |
| 36 |                  | #12c | Explain how missing data were addressed                           | 8 and 9  |
| 37 |                  |      |                                                                   |          |
| 38 |                  | #12d | If applicable, explain how loss to follow-up was addressed        | 8 and 9  |
| 39 |                  |      |                                                                   |          |
| 40 |                  |      |                                                                   |          |
| 41 |                  | #12e | Describe any sensitivity analyses                                 | 8 and 9  |
| 42 |                  |      |                                                                   |          |
| 43 | Participants     | #13a | Report numbers of individuals at each stage of study—eg           | 9 and 10 |
| 44 |                  |      | numbers potentially eligible, examined for eligibility, confirmed |          |
| 45 |                  |      | eligible, included in the study, completing follow-up, and        |          |
| 46 |                  |      | analysed. Give information separately for for exposed and         |          |
| 47 |                  |      | unexposed groups if applicable.                                   |          |
| 48 |                  |      |                                                                   |          |
| 49 |                  |      |                                                                   |          |
| 50 |                  |      |                                                                   |          |
| 51 |                  | #13b | Give reasons for non-participation at each stage                  | 9 and 10 |
| 52 |                  |      |                                                                   |          |
| 53 |                  |      |                                                                   |          |
| 54 |                  | #13c | Consider use of a flow diagram                                    | n/a      |
| 55 |                  |      |                                                                   |          |
| 56 | Descriptive data | #14a | Give characteristics of study participants (eg demographic,       | 9 and 10 |
| 57 |                  |      | clinical, social) and information on exposures and potential      |          |
| 58 |                  |      |                                                                   |          |
| 59 |                  |      |                                                                   |          |
| 60 |                  |      |                                                                   |          |

|    |                  |                                                                        |          |
|----|------------------|------------------------------------------------------------------------|----------|
| 1  |                  | confounders. Give information separately for exposed and               |          |
| 2  |                  | unexposed groups if applicable.                                        |          |
| 3  |                  |                                                                        |          |
| 4  |                  | #14b Indicate number of participants with missing data for each        | n/a      |
| 5  |                  | variable of interest                                                   |          |
| 6  |                  |                                                                        |          |
| 7  |                  |                                                                        |          |
| 8  |                  | #14c Summarise follow-up time (eg, average and total amount)           | 9 and 10 |
| 9  |                  |                                                                        |          |
| 10 | Outcome data     | #15 Report numbers of outcome events or summary measures               | 10 and   |
| 11 |                  | over time. Give information separately for exposed and                 | 11       |
| 12 |                  | unexposed groups if applicable.                                        |          |
| 13 |                  |                                                                        |          |
| 14 |                  |                                                                        |          |
| 15 | Main results     | #16a Give unadjusted estimates and, if applicable, confounder-         | 10 and   |
| 16 |                  | adjusted estimates and their precision (eg, 95% confidence             | 11       |
| 17 |                  | interval). Make clear which confounders were adjusted for and          |          |
| 18 |                  | why they were included                                                 |          |
| 19 |                  |                                                                        |          |
| 20 |                  |                                                                        |          |
| 21 |                  |                                                                        |          |
| 22 |                  | #16b Report category boundaries when continuous variables were         | 10 and   |
| 23 |                  | categorized                                                            | 11       |
| 24 |                  |                                                                        |          |
| 25 |                  |                                                                        |          |
| 26 |                  | #16c If relevant, consider translating estimates of relative risk into | n/a      |
| 27 |                  | absolute risk for a meaningful time period                             |          |
| 28 |                  |                                                                        |          |
| 29 |                  |                                                                        |          |
| 30 | Other analyses   | #17 Report other analyses done—e.g., analyses of subgroups and         | 10 and   |
| 31 |                  | interactions, and sensitivity analyses                                 | 11       |
| 32 |                  |                                                                        |          |
| 33 |                  |                                                                        |          |
| 34 | Key results      | #18 Summarise key results with reference to study objectives           | 11 and   |
| 35 |                  |                                                                        | 12       |
| 36 |                  |                                                                        |          |
| 37 |                  |                                                                        |          |
| 38 | Limitations      | #19 Discuss limitations of the study, taking into account sources of   | 13       |
| 39 |                  | potential bias or imprecision. Discuss both direction and              |          |
| 40 |                  | magnitude of any potential bias.                                       |          |
| 41 |                  |                                                                        |          |
| 42 |                  |                                                                        |          |
| 43 | Interpretation   | #20 Give a cautious overall interpretation considering objectives,     | 13 and   |
| 44 |                  | limitations, multiplicity of analyses, results from similar studies,   | 14       |
| 45 |                  | and other relevant evidence.                                           |          |
| 46 |                  |                                                                        |          |
| 47 |                  |                                                                        |          |
| 48 | Generalisability | #21 Discuss the generalisability (external validity) of the study      | 13 and   |
| 49 |                  | results                                                                | 14       |
| 50 |                  |                                                                        |          |
| 51 |                  |                                                                        |          |
| 52 | Funding          | #22 Give the source of funding and the role of the funders for the     | 15 and   |
| 53 |                  | present study and, if applicable, for the original study on which      | 16       |
| 54 |                  | the present article is based                                           |          |
| 55 |                  |                                                                        |          |
| 56 |                  |                                                                        |          |
| 57 |                  |                                                                        |          |

## Author notes

1. 6, 7 and 8

The STROBE checklist is distributed under the terms of the Creative Commons Attribution License CC-BY. This checklist was completed on 02. March 2018 using <http://www.goodreports.org/>, a tool made by the [EQUATOR Network](#) in collaboration with [Penelope.ai](#)

For peer review only
